# Supplementary material for: Interactions with humans shape coyote responses to hazing
Source: PubMed Central journal article supplement (PMC6934508; doi:10.1038/s41598-019-56524-6), 2019-12-27
Supplement: 41598_2019_56524_MOESM1_ESM.pdf [file 41598_2019_56524_MOESM1_ESM.pdf]

## **Interactions with humans shape coyote responses to hazing**

Julie K. Young, Edd Hammil, and Stewart W. Breck

Figure S1.

Adult

Child

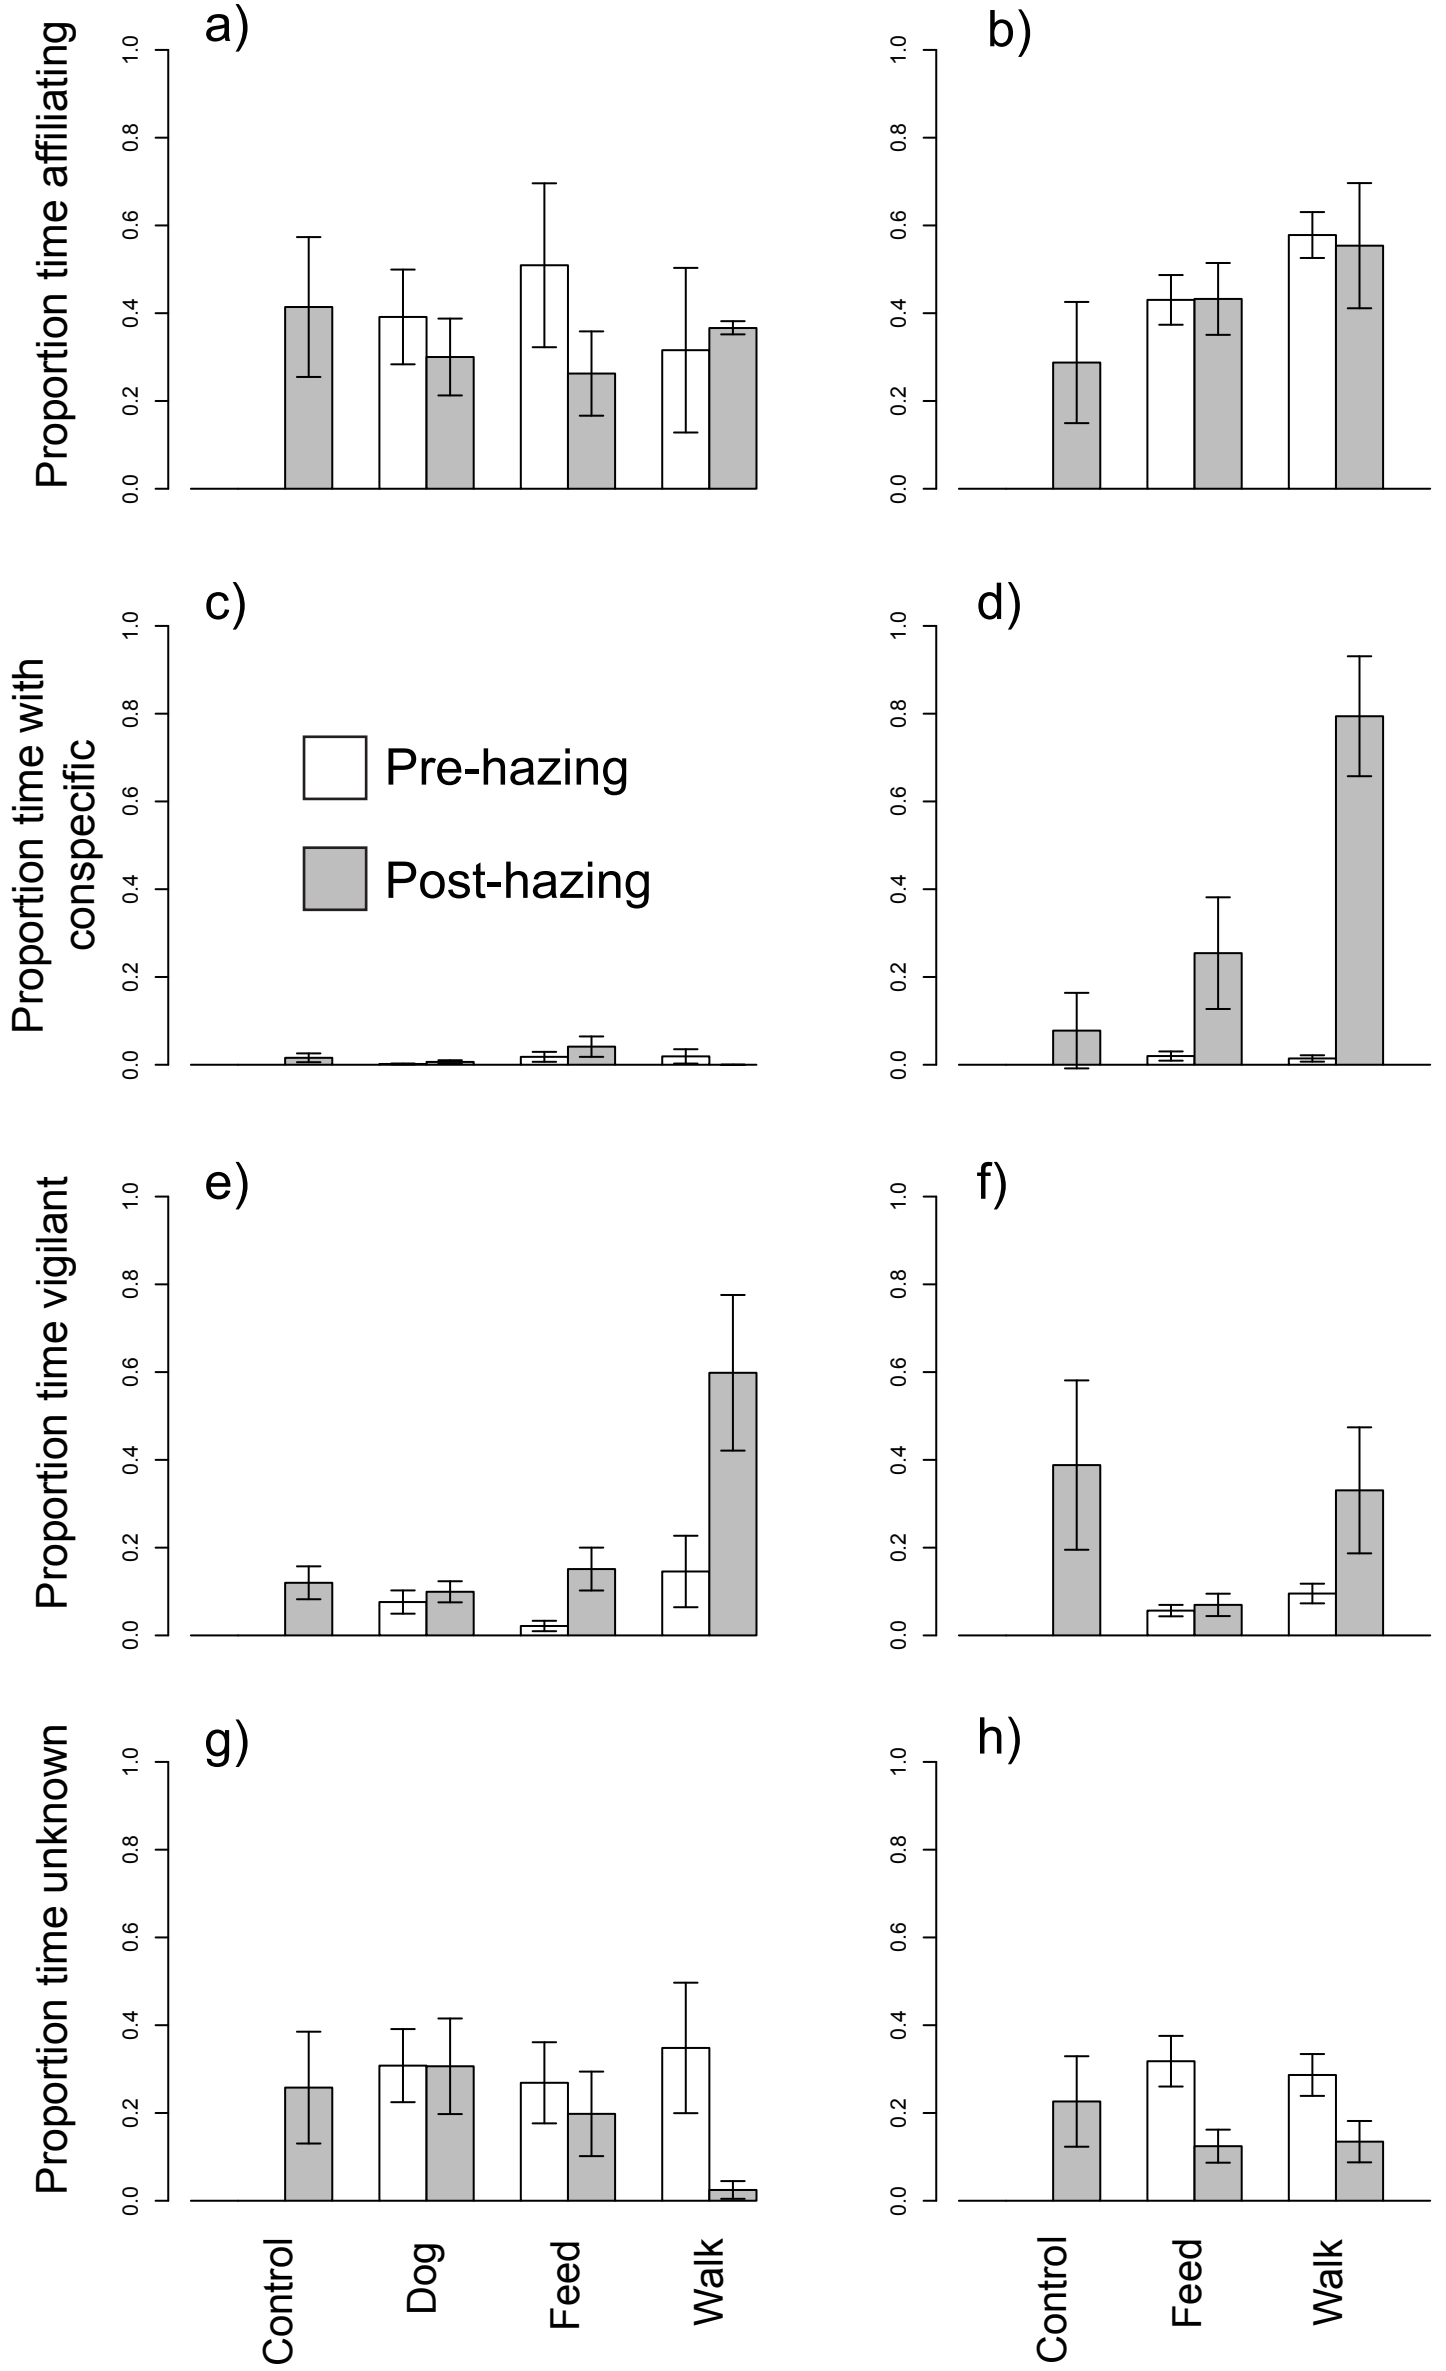

Table S1.

| Raw Data |       |     |      |       |         |          |     |     |         |             |         |            |       |       |      |     |     |          |           |           |          |         |         |
|----------|-------|-----|------|-------|---------|----------|-----|-----|---------|-------------|---------|------------|-------|-------|------|-----|-----|----------|-----------|-----------|----------|---------|---------|
| Group    | Month | Day | Type | Human | CoyTest | FlagTest | Coy | pen | pen.grp | grp.day.pen | uniq.ID | #TimesHaze | Avoid | Affil | Cons | Vig | unk | TOTALsec | propAvoid | PropAffil | PropCons | PropVig | PropUnk |
| 1        | April | 1   | Dog  | adult | Bold    | Bold     | 1   | 1   | 1.1     | 1m1m1       | 1.1.1   | 0          | 8     | 105   | 0    | 27  | 56  | 196      | 0.0408    | 0.5357    | 0        | 0.1378  | 0.2857  |
| 1        | April | 1   | Dog  | adult | Bold    | Bold     | 2   | 1   | 1.1     | 1m1m1       | 1.2.1   | 0          | 24    | 47    | 0    | 10  | 112 | 193      | 0.1244    | 0.2435    | 0        | 0.0518  | 0.5803  |
| 1        | April | 2   | Dog  | adult | Bold    | Bold     | 1   | 1   | 1.1     | 1m1m2       | 1.1.1   | 0          | 39    | 100   | 3    | 42  | 24  | 208      | 0.1875    | 0.4808    | 0.0144   | 0.2019  | 0.1154  |
| 1        | April | 2   | Dog  | adult | Bold    | Bold     | 2   | 1   | 1.1     | 1m1m2       | 1.2.1   | 0          | 15    | 166   | 2    | 20  | 5   | 208      | 0.0721    | 0.7981    | 0.0096   | 0.0962  | 0.024   |
| 1        | April | 3   | Dog  | adult | Bold    | Bold     | 1   | 1   | 1.1     | 1m1m3       | 1.1.1   | 0          | 15    | 140   | 4    | 27  | 30  | 216      | 0.0694    | 0.6481    | 0.0185   | 0.125   | 0.1389  |
| 1        | April | 3   | Dog  | adult | Bold    | Bold     | 2   | 1   | 1.1     | 1m1m3       | 1.2.1   | 0          | 7     | 172   | 0    | 29  | 8   | 216      | 0.0324    | 0.7963    | 0        | 0.1343  | 0.037   |
| 1        | April | 4   | Dog  | adult | Bold    | Bold     | 1   | 1   | 1.1     | 1m1m4       | 1.1.1   | 0          | 5     | 136   | 9    | 59  | 18  | 227      | 0.022     | 0.5991    | 0.0396   | 0.2599  | 0.0793  |
| 1        | April | 4   | Dog  | adult | Bold    | Bold     | 2   | 1   | 1.1     | 1m1m4       | 1.2.1   | 0          | 4     | 120   | 4    | 42  | 37  | 207      | 0.0193    | 0.5797    | 0.0193   | 0.2029  | 0.1787  |
| 1        | April | 5   | Dog  | adult | Bold    | Bold     | 1   | 1   | 1.1     | 1m1m5       | 1.1.1   | 0          | 16    | 93    | 36   | 122 | 4   | 271      | 0.059     | 0.3432    | 0.1328   | 0.4502  | 0.0148  |
| 1        | April | 5   | Dog  | adult | Bold    | Bold     | 2   | 1   | 1.1     | 1m1m5       | 1.2.1   | 0          | 12    | 132   | 7    | 76  | 44  | 271      | 0.0443    | 0.4871    | 0.0258   | 0.2804  | 0.1624  |
| 1        | April | 12  | Dog  | adult | Bold    | Bold     | 1   | 1   | 1.1     | 1m1m12      | 1.1.1   | 0          | 80    | 57    | 0    | 41  | 110 | 288      | 0.2778    | 0.1979    | 0        | 0.1424  | 0.3819  |
| 1        | April | 1   | Dog  | adult | Shy     | Shy      | 1   | 2   | 1.2     | 1m2m1       | 1.1.2   | 0          | 6     | 10    | 14   | 0   | 100 | 130      | 0.0462    | 0.0769    | 0.1077   | 0       | 0.7692  |
| 1        | April | 1   | Dog  | adult | Shy     | Shy      | 2   | 2   | 1.2     | 1m2m1       | 1.2.2   | 0          | 3     | 0     | 8    | 0   | 119 | 130      | 0.0231    | 0         | 0.0615   | 0       | 0.9154  |
| 1        | April | 2   | Dog  | adult | Shy     | Shy      | 1   | 2   | 1.2     | 1m2m2       | 1.1.2   | 0          | 16    | 55    | 0    | 19  | 121 | 211      | 0.0758    | 0.2607    | 0        | 0.09    | 0.5735  |
| 1        | April | 2   | Dog  | adult | Shy     | Shy      | 2   | 2   | 1.2     | 1m2m2       | 1.2.2   | 0          | 3     | 49    | 0    | 23  | 136 | 211      | 0.0142    | 0.2322    | 0        | 0.109   | 0.6445  |
| 1        | April | 3   | Dog  | adult | Shy     | Shy      | 1   | 2   | 1.2     | 1m2m3       | 1.1.2   | 0          | 15    | 116   | 0    | 21  | 13  | 165      | 0.0909    | 0.703     | 0        | 0.1273  | 0.0788  |
| 1        | April | 3   | Dog  | adult | Shy     | Shy      | 2   | 2   | 1.2     | 1m2m3       | 1.2.2   | 0          | 29    | 34    | 0    | 24  | 78  | 165      | 0.1758    | 0.2061    | 0        | 0.1455  | 0.4727  |
| 1        | April | 4   | Dog  | adult | Shy     | Shy      | 1   | 2   | 1.2     | 1m2m4       | 1.1.2   | 0          | 5     | 69    | 0    | 59  | 17  | 150      | 0.0333    | 0.46      | 0        | 0.3933  | 0.1133  |
| 1        | April | 4   | Dog  | adult | Shy     | Shy      | 2   | 2   | 1.2     | 1m2m4       | 1.2.2   | 0          | 30    | 48    | 0    | 11  | 61  | 150      | 0.2       | 0.32      | 0        | 0.0733  | 0.4067  |
| 1        | April | 5   | Dog  | adult | Shy     | Shy      | 1   | 2   | 1.2     | 1m2m5       | 1.1.2   | 0          | 11    | 110   | 0    | 30  | 46  | 197      | 0.0558    | 0.5584    | 0        | 0.1523  | 0.2335  |
| 1        | April | 5   | Dog  | adult | Shy     | Shy      | 2   | 2   | 1.2     | 1m2m5       | 1.2.2   | 0          | 12    | 33    | 0    | 41  | 111 | 197      | 0.0609    | 0.1675    | 0        | 0.2081  | 0.5635  |
| 1        | April | 8   | Dog  | adult | Shy     | Shy      | 1   | 2   | 1.2     | 1m2m8       | 1.1.2   | 0          | 23    | 40    | 0    | 28  | 102 | 193      | 0.1192    | 0.2073    | 0        | 0.1451  | 0.5285  |
| 1        | April | 9   | Dog  | adult | Shy     | Shy      | 1   | 2   | 1.2     | 1m2m9       | 1.1.2   | 0          | 28    | 75    | 0    | 26  | 88  | 217      | 0.129     | 0.3456    | 0        | 0.1198  | 0.4055  |
| 1        | April | 11  | Dog  | adult | Shy     | Shy      | 1   | 2   | 1.2     | 1m2m11      | 1.1.2   | 0          | 16    | 49    | 0    | 48  | 111 | 224      | 0.0714    | 0.2188    | 0        | 0.2143  | 0.4955  |
| 1        | April | 1   | Feed | adult | Shy     | Shy      | 1   | 3   | 1.3     | 1m3m1       | 1.1.3   | 0          | 23    | 0     | 0    | 0   | 211 | 234      | 0.0983    | 0         | 0        | 0       | 0.9017  |
| 1        | April | 1   | Feed | adult | Shy     | Shy      | 2   | 3   | 1.3     | 1m3m1       | 1.2.3   | 0          | 30    | 0     | 0    | 0   | 206 | 236      | 0.1271    | 0         | 0        | 0       | 0.8729  |
| 1        | April | 2   | Feed | adult | Shy     | Shy      | 1   | 3   | 1.3     | 1m3m2       | 1.1.3   | 0          | 52    | 0     | 0    | 16  | 221 | 289      | 0.1799    | 0         | 0        | 0.0554  | 0.7647  |
| 1        | April | 2   | Feed | adult | Shy     | Shy      | 2   | 3   | 1.3     | 1m3m2       | 1.2.3   | 0          | 97    | 18    | 0    | 9   | 165 | 289      | 0.3356    | 0.0623    | 0        | 0.0311  | 0.5709  |
| 1        | April | 3   | Feed | adult | Shy     | Shy      | 1   | 3   | 1.3     | 1m3m3       | 1.1.3   | 0          | 65    | 24    | 0    | 6   | 172 | 267      | 0.2434    | 0.0899    | 0        | 0.0225  | 0.6442  |
| 1        | April | 3   | Feed | adult | Shy     | Shy      | 2   | 3   | 1.3     | 1m3m3       | 1.2.3   | 0          | 95    | 17    | 9    | 10  | 136 | 267      | 0.3558    | 0.0637    | 0.0337   | 0.0375  | 0.5094  |
| 1        | April | 4   | Feed | adult | Shy     | Shy      | 1   | 3   | 1.3     | 1m3m4       | 1.1.3   | 0          | 127   | 0     | 0    | 3   | 139 | 269      | 0.4721    | 0         | 0        | 0.0112  | 0.5167  |
| 1        | April | 4   | Feed | adult | Shy     | Shy      | 2   | 3   | 1.3     | 1m3m4       | 1.2.3   | 0          | 90    | 0     | 0    | 27  | 152 | 269      | 0.3346    | 0         | 0        | 0.1004  | 0.5651  |
| 1        | April | 5   | Feed | adult | Shy     | Shy      | 1   | 3   | 1.3     | 1m3m5       | 1.1.3   | 0          | 160   | 10    | 0    | 64  | 108 | 342      | 0.4678    | 0.0292    | 0        | 0.1871  | 0.3158  |
| 1        | April | 5   | Feed | adult | Shy     | Shy      | 2   | 3   | 1.3     | 1m3m5       | 1.2.3   | 0          | 120   | 28    | 0    | 80  | 114 | 342      | 0.3509    | 0.0819    | 0        | 0.2339  | 0.3333  |
| 1        | April | 8   | Feed | adult | Shy     | Shy      | 1   | 3   | 1.3     | 1m3m8       | 1.1.3   | 0          | 132   | 11    | 0    | 25  | 87  | 255      | 0.5176    | 0.0431    | 0        | 0.098   | 0.3412  |
| 1        | April | 8   | Feed | adult | Shy     | Shy      | 2   | 3   | 1.3     | 1m3m8       | 1.2.3   | 0          | 140   | 0     | 0    | 47  | 68  | 255      | 0.549     | 0         | 0        | 0.1843  | 0.2667  |
| 1        | April | 9   | Feed | adult | Shy     | Shy      | 1   | 3   | 1.3     | 1m3m9       | 1.1.3   | 0          | 115   | 0     | 0    | 7   | 112 | 234      | 0.4915    | 0         | 0        | 0.0299  | 0.4786  |
| 1        | April | 9   | Feed | adult | Shy     | Shy      | 2   | 3   | 1.3     | 1m3m9       | 1.2.3   | 0          | 91    | 0     | 0    | 0   | 143 | 234      | 0.3889    | 0         | 0        | 0       | 0.6111  |
| 1        | April | 10  | Feed | adult | Shy     | Shy      | 1   | 3   | 1.3     | 1m3m10      | 1.1.3   | 0          | 203   | 0     | 0    | 19  | 28  | 250      | 0.812     | 0         | 0        | 0.076   | 0.112   |
| 1        | April | 10  | Feed | adult | Shy     | Shy      | 2   | 3   | 1.3     | 1m3m10      | 1.2.3   | 0          | 197   | 0     | 0    | 10  | 43  | 250      | 0.788     | 0         | 0        | 0.04    | 0.172   |
| 1        | April | 11  | Feed | adult | Shy     | Shy      | 1   | 3   | 1.3     | 1m3m11      | 1.1.3   | 0          | 181   | 0     | 0    | 45  | 62  | 288      | 0.6285    | 0         | 0        | 0.1563  | 0.2153  |
| 1        | April | 11  | Feed | adult | Shy     | Shy      | 2   | 3   | 1.3     | 1m3m11      | 1.2.3   | 0          | 192   | 0     | 0    | 38  | 56  | 286      | 0.6713    | 0         | 0        | 0.1329  | 0.1958  |
| 1        | April | 12  | Feed | adult | Shy     | Shy      | 1   | 3   | 1.3     | 1m3m12      | 1.1.3   | 0          | 104   | 0     | 0    | 3   | 128 | 235      | 0.4426    | 0         | 0        | 0.0128  | 0.5447  |
| 1        | April | 12  | Feed | adult | Shy     | Shy      | 2   | 3   | 1.3     | 1m3m12      | 1.2.3   | 0          | 130   | 0     | 0    | 15  | 90  | 235      | 0.5532    | 0         | 0        | 0.0638  | 0.383   |
| 1        | April | 1   | Feed | adult | Bold    | Bold     | 1   | 4   | 1.4     | 1m4m1       | 1.1.4   | 0          | 6     | 126   | 11   | 5   | 9   | 157      | 0.0382    | 0.8025    | 0.0701   | 0.0318  | 0.0573  |
| 1        | April | 1   | Feed | adult | Bold    | Bold     | 2   | 4   | 1.4     | 1m4m1       | 1.2.4   | 0          | 38    | 72    | 0    | 0   | 153 | 263      | 0.1445    | 0.2738    | 0        | 0       | 0.5817  |
| 1        | April | 2   | Feed | adult | Bold    | Bold     | 1   | 4   | 1.4     | 1m4m2       | 1.1.4   | 0          | 19    | 148   | 0    | 0   | 0   | 167      | 0.1138    | 0.8862    | 0        | 0       | 0       |
| 1        | April | 2   | Feed | adult | Bold    | Bold     | 2   | 4   | 1.4     | 1m4m2       | 1.2.4   | 0          | 33    | 68    | 12   | 8   | 142 | 263      | 0.1255    | 0.2586    | 0.0456   | 0.0304  | 0.5399  |
| 1        | April | 3   | Feed | adult | Bold    | Bold     | 1   | 4   | 1.4     | 1m4m3       | 1.1.4   | 0          | 42    | 133   | 0    | 0   | 44  | 219      | 0.1918    | 0.6073    | 0        | 0       | 0.2009  |
| 1        | April | 3   | Feed | adult | Bold    | Bold     | 2   | 4   | 1.4     | 1m4m3       | 1.2.4   | 0          | 37    | 137   | 0    | 14  | 49  | 237      | 0.1561    | 0.5781    | 0        | 0.0591  | 0.2068  |
| 1        | April | 4   | Feed | adult | Bold    | Bold     | 1   | 4   | 1.4     | 1m4m4       | 1.1.4   | 0          | 24    | 131   | 2    | 5   | 20  | 182      | 0.1319    | 0.7198    | 0.011    | 0.0275  | 0.1099  |
| 1        | April | 4   | Feed | adult | Bold    | Bold     | 2   | 4   | 1.4     | 1m4m4       | 1.2.4   | 0          | 52    | 101   | 0    | 10  | 23  | 186      | 0.2796    | 0.543     | 0        | 0.0538  | 0.1237  |
| 1        | April | 5   | Feed | adult | Bold    | Bold     | 1   | 4   | 1.4     | 1m4m5       | 1.1.4   | 0          | 40    | 46    | 2    | 10  | 98  | 196      | 0.2041    | 0.2347    | 0.0102   | 0.051   | 0.5     |
| 1        | April | 5   | Feed | adult | Bold    | Bold     | 2   | 4   | 1.4     | 1m4m5       | 1.2.4   | 0          | 30    | 20    | 0    | 0   | 93  | 143      | 0.2098    | 0.1399    | 0        | 0       | 0.6503  |
| 1        | April | 8   | Feed | adult | Bold    | Bold     | 1   | 4   | 1.4     | 1m4m8       | 1.1.4   | 0          | 39    | 34    | 16   | 10  | 170 | 269      | 0.145     | 0.1264    | 0.0595   | 0.0372  | 0.632   |
| 1        | April | 10  | Feed | adult | Bold    | Bold     | 2   | 4   | 1.4     | 1m4m10      | 1.2.4   | 0          | 3     | 86    | 6    | 23  | 128 | 246      | 0.0122    | 0.3496    | 0.0244   | 0.0935  | 0.5203  |
| 1        | April | 12  | Feed | adult | Bold    | Bold     | 1   | 4   | 1.4     | 1m4m12      | 1.1.4   | 0          | 44    | 21    | 4    | 24  | 172 | 265      | 0.166     | 0.0792    | 0.0151   | 0.0906  | 0.6491  |
| 1        | April | 12  | Feed | adult | Bold    | Bold     | 2   | 4   | 1.4     | 1m4m12      | 1.2.4   | 0          | 51    | 30    | 0    | 42  | 142 | 265      | 0.1925    | 0.1132    | 0        | 0.1585  | 0.5358  |
| 1        | April | 1   | Walk | adult | Bold    | Bold     | 1   | 5   | 1.5     | 1m5m1       | 1.1.5   | 0          | 8     | 0     | 0    | 0   | 223 | 231      | 0.0346    | 0         | 0        | 0       | 0.9654  |
| 1        | April | 1   | Walk | adult | Bold    | Bold     | 2   | 5   | 1.5     | 1m5m1       | 1.2.5   | 0          | 51    | 0     | 0    | 0   | 180 | 231      | 0.2208    | 0         | 0        | 0       | 0.7792  |
| 1        | April | 2   | Walk | adult | Bold    | Bold     | 1   | 5   | 1.5     | 1m5m2       | 1.1.5   | 0          | 25    | 13    | 0    | 11  | 151 | 200      | 0.125     | 0.065     | 0        | 0.055   | 0.755   |
| 1        | April | 2   | Walk | adult | Bold    | Bold     | 2   | 5   | 1.5     | 1m5m2       | 1.2.5   | 0          | 20    | 18    | 0    | 16  | 146 | 200      | 0.1       | 0.09      | 0        | 0.08    | 0.73    |
| 1        | April | 3   | Walk | adult | Bold    | Bold     | 1   | 5   | 1.5     | 1m5m3       | 1.1.5   | 0          | 38    | 0     | 0    | 0   | 184 | 222      | 0.1712    | 0         | 0        | 0       | 0.8288  |
| 1        | April | 3   | Walk | adult | Bold    | Bold     | 2   | 5   | 1.5     | 1m5m3       | 1.2.5   | 0          | 34    | 0     | 0    | 24  | 164 | 222      | 0.1532    | 0         | 0        | 0.1081  | 0.7387  |
| 1        | April | 4   | Walk | adult | Bold    | Bold     | 1   | 5   | 1.5     | 1m5m4       | 1.1.5   | 0          | 77    | 23    | 0    | 27  | 126 | 253      | 0.3043    | 0.0909    | 0        | 0.1067  | 0.498   |
| 1        | April | 4   | Walk | adult | Bold    | Bold     | 2   | 5   | 1.5     | 1m5m4       | 1.2.5   | 0          |       |       |      |     |     |          |           |           |          |         |         |

|   |       |    |           |       |      |      |   |   |     |        |       |   |     |     |    |     |     |     |        |        |        |        |        |        |
|---|-------|----|-----------|-------|------|------|---|---|-----|--------|-------|---|-----|-----|----|-----|-----|-----|--------|--------|--------|--------|--------|--------|
| 1 | April | 11 | Walk      | adult | Bold | Bold | 1 | 7 | 1.7 | 1m7m11 | 1.1.7 | 0 | 0   | 0   | 0  | 63  | 177 | 240 | 0      | 0      | 0      | 0.2625 | 0.7375 |        |
| 1 | April | 12 | Walk      | adult | Bold | Bold | 1 | 7 | 1.7 | 1m7m12 | 1.1.7 | 0 | 24  | 0   | 0  | 26  | 170 | 220 | 0.1091 | 0      | 0      | 0      | 0.1182 | 0.7727 |
| 1 | April | 12 | Walk      | adult | Bold | Bold | 2 | 7 | 1.7 | 1m7m12 | 1.2.7 | 0 | 38  | 2   | 0  | 23  | 157 | 220 | 0.1727 | 0.0091 | 0      | 0      | 0.1045 | 0.7136 |
| 1 | April | 8  | aControl  | adult | Shy  | Shy  | 2 | 8 | 1.8 | 1m8m8  | 1.2.8 | 0 | 0   | 41  | 0  | 13  | 189 | 243 | 0      | 0.1687 | 0      | 0      | 0.0535 | 0.7778 |
| 1 | April | 9  | aControl  | adult | Shy  | Shy  | 2 | 8 | 1.8 | 1m8m9  | 1.2.8 | 0 | 0   | 55  | 0  | 13  | 177 | 245 | 0      | 0.2245 | 0      | 0      | 0.0531 | 0.7224 |
| 1 | April | 10 | aControl  | adult | Shy  | Shy  | 2 | 8 | 1.8 | 1m8m10 | 1.2.8 | 0 | 14  | 40  | 0  | 10  | 175 | 239 | 0.0586 | 0.1674 | 0      | 0      | 0.0418 | 0.7322 |
| 1 | April | 12 | aControl  | adult | Shy  | Shy  | 1 | 8 | 1.8 | 1m8m12 | 1.1.8 | 0 | 27  | 0   | 0  | 65  | 136 | 228 | 0.1184 | 0      | 0      | 0      | 0.2851 | 0.5965 |
| 2 | June  | 1  | ChildFeed | child | Bold | Bold | 1 | 1 | 2.1 | 2m1m1  | 2.1.1 | 0 | 18  | 48  | 0  | 18  | 149 | 233 | 0.0773 | 0.206  | 0      | 0      | 0.0773 | 0.6395 |
| 2 | June  | 1  | ChildFeed | child | Bold | Bold | 2 | 1 | 2.1 | 2m1m1  | 2.2.1 | 0 | 32  | 81  | 0  | 24  | 96  | 233 | 0.1373 | 0.3476 | 0      | 0      | 0.103  | 0.412  |
| 2 | June  | 2  | ChildFeed | child | Bold | Bold | 1 | 1 | 2.1 | 2m1m2  | 2.1.1 | 0 | 70  | 59  | 0  | 0   | 58  | 187 | 0.3743 | 0.3155 | 0      | 0      | 0      | 0.3102 |
| 2 | June  | 2  | ChildFeed | child | Bold | Bold | 2 | 1 | 2.1 | 2m1m2  | 2.2.1 | 0 | 123 | 54  | 0  | 0   | 53  | 230 | 0.5348 | 0.2348 | 0      | 0      | 0      | 0.2304 |
| 2 | June  | 3  | ChildFeed | child | Bold | Bold | 1 | 1 | 2.1 | 2m1m3  | 2.1.1 | 0 | 33  | 56  | 11 | 2   | 41  | 143 | 0.2308 | 0.3916 | 0.0769 | 0      | 0.014  | 0.2867 |
| 2 | June  | 3  | ChildFeed | child | Bold | Bold | 2 | 1 | 2.1 | 2m1m3  | 2.2.1 | 0 | 36  | 145 | 0  | 0   | 6   | 187 | 0.1925 | 0.7754 | 0      | 0      | 0      | 0.0321 |
| 2 | June  | 4  | ChildFeed | child | Bold | Bold | 1 | 1 | 2.1 | 2m1m4  | 2.1.1 | 0 | 45  | 91  | 0  | 4   | 20  | 160 | 0.2813 | 0.5688 | 0      | 0      | 0.025  | 0.125  |
| 2 | June  | 4  | ChildFeed | child | Bold | Bold | 2 | 1 | 2.1 | 2m1m4  | 2.2.1 | 0 | 15  | 66  | 0  | 11  | 52  | 144 | 0.1042 | 0.4583 | 0      | 0      | 0.0764 | 0.3611 |
| 2 | June  | 5  | ChildFeed | child | Bold | Bold | 1 | 1 | 2.1 | 2m1m5  | 2.1.1 | 0 | 23  | 46  | 12 | 6   | 61  | 148 | 0.1554 | 0.3108 | 0.0811 | 0      | 0.0405 | 0.4122 |
| 2 | June  | 5  | ChildFeed | child | Bold | Bold | 2 | 1 | 2.1 | 2m1m5  | 2.2.1 | 0 | 48  | 82  | 0  | 0   | 0   | 130 | 0.3692 | 0.6308 | 0      | 0      | 0      | 0      |
| 2 | June  | 9  | ChildFeed | child | Bold | Bold | 1 | 1 | 2.1 | 2m1m9  | 2.1.1 | 0 | 18  | 116 | 11 | 80  | 0   | 225 | 0.08   | 0.5156 | 0.0489 | 0.3556 | 0      | 0      |
| 2 | June  | 9  | ChildFeed | child | Bold | Bold | 2 | 1 | 2.1 | 2m1m9  | 2.2.1 | 0 | 38  | 40  | 12 | 90  | 45  | 225 | 0.1689 | 0.1778 | 0.0533 | 0.4    | 0.2    | 0      |
| 2 | June  | 10 | ChildFeed | child | Bold | Bold | 1 | 1 | 2.1 | 2m1m10 | 2.1.1 | 0 | 95  | 33  | 10 | 73  | 17  | 228 | 0.4167 | 0.1447 | 0.0439 | 0.3202 | 0.0746 | 0      |
| 2 | June  | 10 | ChildFeed | child | Bold | Bold | 2 | 1 | 2.1 | 2m1m10 | 2.2.1 | 0 | 120 | 10  | 13 | 85  | 0   | 228 | 0.5263 | 0.0439 | 0.057  | 0.3728 | 0      | 0      |
| 2 | June  | 12 | ChildFeed | child | Bold | Bold | 1 | 1 | 2.1 | 2m1m12 | 2.1.1 | 0 | 0   | 70  | 70 | 23  | 0   | 163 | 0      | 0.4294 | 0.4294 | 0.1411 | 0      | 0      |
| 2 | June  | 12 | ChildFeed | child | Bold | Bold | 2 | 1 | 2.1 | 2m1m12 | 2.2.1 | 0 | 8   | 51  | 73 | 31  | 0   | 163 | 0.0491 | 0.3129 | 0.4479 | 0.1902 | 0      | 0      |
| 2 | June  | 1  | ChildFeed | child | Bold | Bold | 1 | 2 | 2.2 | 2m2m1  | 2.1.2 | 0 | 59  | 141 | 0  | 0   | 26  | 226 | 0.2611 | 0.6239 | 0      | 0      | 0      | 0.115  |
| 2 | June  | 1  | ChildFeed | child | Bold | Bold | 2 | 2 | 2.2 | 2m2m1  | 2.2.2 | 0 | 0   | 90  | 2  | 0   | 85  | 177 | 0      | 0.5085 | 0.0113 | 0      | 0      | 0.4802 |
| 2 | June  | 2  | ChildFeed | child | Bold | Bold | 1 | 2 | 2.2 | 2m2m2  | 2.1.2 | 0 | 63  | 90  | 0  | 0   | 19  | 172 | 0.3663 | 0.5233 | 0      | 0      | 0      | 0.1105 |
| 2 | June  | 2  | ChildFeed | child | Bold | Bold | 2 | 2 | 2.2 | 2m2m2  | 2.2.2 | 0 | 15  | 2   | 0  | 35  | 110 | 162 | 0.0926 | 0.0123 | 0      | 0.216  | 0.679  |        |
| 2 | June  | 3  | ChildFeed | child | Bold | Bold | 1 | 2 | 2.2 | 2m2m3  | 2.1.2 | 0 | 16  | 110 | 0  | 0   | 19  | 145 | 0.1103 | 0.7586 | 0      | 0      | 0      | 0.131  |
| 2 | June  | 3  | ChildFeed | child | Bold | Bold | 2 | 2 | 2.2 | 2m2m3  | 2.2.2 | 0 | 0   | 16  | 6  | 24  | 68  | 114 | 0      | 0.1404 | 0.0526 | 0.2105 | 0.5965 | 0      |
| 2 | June  | 4  | ChildFeed | child | Bold | Bold | 1 | 2 | 2.2 | 2m2m4  | 2.1.2 | 0 | 30  | 112 | 0  | 0   | 0   | 142 | 0.2113 | 0.7887 | 0      | 0      | 0      | 0      |
| 2 | June  | 4  | ChildFeed | child | Bold | Bold | 2 | 2 | 2.2 | 2m2m4  | 2.2.2 | 0 | 12  | 69  | 6  | 29  | 38  | 154 | 0.0779 | 0.4481 | 0.039  | 0.1883 | 0.2468 | 0      |
| 2 | June  | 5  | ChildFeed | child | Bold | Bold | 1 | 2 | 2.2 | 2m2m5  | 2.1.2 | 0 | 0   | 0   | 13 | 6   | 56  | 75  | 0      | 0      | 0.1733 | 0.08   | 0.7467 | 0      |
| 2 | June  | 5  | ChildFeed | child | Bold | Bold | 2 | 2 | 2.2 | 2m2m5  | 2.2.2 | 0 | 8   | 50  | 9  | 0   | 0   | 67  | 0.1194 | 0.7463 | 0.1343 | 0      | 0      | 0      |
| 2 | June  | 9  | ChildFeed | child | Bold | Bold | 1 | 2 | 2.2 | 2m2m9  | 2.1.2 | 0 | 0   | 8   | 0  | 114 | 107 | 229 | 0      | 0.0349 | 0      | 0      | 0.4978 | 0.4672 |
| 2 | June  | 9  | ChildFeed | child | Bold | Bold | 2 | 2 | 2.2 | 2m2m9  | 2.2.2 | 0 | 68  | 74  | 0  | 87  | 0   | 229 | 0.2969 | 0.3231 | 0      | 0      | 0.3799 | 0      |
| 2 | June  | 12 | ChildFeed | child | Bold | Bold | 1 | 2 | 2.2 | 2m2m12 | 2.1.2 | 0 | 33  | 41  | 10 | 95  | 0   | 179 | 0.1844 | 0.2291 | 0.0559 | 0.5307 | 0      | 0      |
| 2 | June  | 12 | ChildFeed | child | Bold | Bold | 2 | 2 | 2.2 | 2m2m12 | 2.2.2 | 0 | 58  | 23  | 0  | 98  | 0   | 179 | 0.324  | 0.1285 | 0      | 0      | 0.5475 | 0      |
| 2 | June  | 1  | ChildFeed | child | Bold | Bold | 1 | 3 | 2.3 | 2m3m1  | 2.1.3 | 0 | 21  | 81  | 0  | 10  | 107 | 219 | 0.0959 | 0.3699 | 0      | 0      | 0.0457 | 0.4886 |
| 2 | June  | 1  | ChildFeed | child | Bold | Bold | 2 | 3 | 2.3 | 2m3m1  | 2.2.3 | 0 | 43  | 111 | 0  | 54  | 10  | 218 | 0.1972 | 0.5092 | 0      | 0      | 0.2477 | 0.0459 |
| 2 | June  | 2  | ChildFeed | child | Bold | Bold | 1 | 3 | 2.3 | 2m3m2  | 2.1.3 | 0 | 88  | 63  | 0  | 26  | 18  | 195 | 0.4513 | 0.3231 | 0      | 0      | 0.1333 | 0.0923 |
| 2 | June  | 2  | ChildFeed | child | Bold | Bold | 2 | 3 | 2.3 | 2m3m2  | 2.2.3 | 0 | 94  | 63  | 0  | 7   | 0   | 164 | 0.5732 | 0.3841 | 0      | 0      | 0.0427 | 0      |
| 2 | June  | 3  | ChildFeed | child | Bold | Bold | 1 | 3 | 2.3 | 2m3m3  | 2.1.3 | 0 | 45  | 53  | 0  | 15  | 0   | 113 | 0.3982 | 0.469  | 0      | 0      | 0.1327 | 0      |
| 2 | June  | 3  | ChildFeed | child | Bold | Bold | 2 | 3 | 2.3 | 2m3m3  | 2.2.3 | 0 | 44  | 46  | 9  | 11  | 21  | 131 | 0.3359 | 0.3511 | 0.0687 | 0.084  | 0.1603 | 0      |
| 2 | June  | 4  | ChildFeed | child | Bold | Bold | 1 | 3 | 2.3 | 2m3m4  | 2.1.3 | 0 | 31  | 44  | 7  | 15  | 0   | 97  | 0.3196 | 0.4536 | 0.0722 | 0.1546 | 0      | 0      |
| 2 | June  | 4  | ChildFeed | child | Bold | Bold | 2 | 3 | 2.3 | 2m3m4  | 2.2.3 | 0 | 0   | 12  | 0  | 19  | 29  | 60  | 0      | 0.2    | 0      | 0      | 0.3167 | 0.4833 |
| 2 | June  | 5  | ChildFeed | child | Bold | Bold | 1 | 3 | 2.3 | 2m3m5  | 2.1.3 | 0 | 19  | 58  | 38 | 6   | 10  | 131 | 0.145  | 0.4427 | 0.2901 | 0.0458 | 0.0763 | 0      |
| 2 | June  | 5  | ChildFeed | child | Bold | Bold | 2 | 3 | 2.3 | 2m3m5  | 2.2.3 | 0 | 14  | 34  | 25 | 6   | 53  | 132 | 0.1061 | 0.2576 | 0.1894 | 0.0455 | 0.4015 | 0      |
| 2 | June  | 8  | ChildFeed | child | Bold | Bold | 1 | 3 | 2.3 | 2m3m8  | 2.1.3 | 0 | 102 | 65  | 8  | 53  | 14  | 242 | 0.4215 | 0.2686 | 0.0331 | 0.219  | 0.0579 | 0      |
| 2 | June  | 8  | ChildFeed | child | Bold | Bold | 2 | 3 | 2.3 | 2m3m8  | 2.2.3 | 0 | 79  | 50  | 0  | 74  | 39  | 242 | 0.3264 | 0.2066 | 0      | 0      | 0.3058 | 0.1612 |
| 2 | June  | 9  | ChildFeed | child | Bold | Bold | 1 | 3 | 2.3 | 2m3m9  | 2.1.3 | 0 | 42  | 132 | 12 | 56  | 12  | 254 | 0.1654 | 0.5197 | 0.0472 | 0.2205 | 0.0472 | 0      |
| 2 | June  | 9  | ChildFeed | child | Bold | Bold | 2 | 3 | 2.3 | 2m3m9  | 2.2.3 | 0 | 57  | 92  | 18 | 64  | 23  | 254 | 0.2244 | 0.3622 | 0.0709 | 0.252  | 0.0906 | 0      |
| 2 | June  | 10 | ChildFeed | child | Bold | Bold | 1 | 3 | 2.3 | 2m3m10 | 2.1.3 | 0 | 0   | 97  | 0  | 145 | 0   | 242 | 0      | 0.4008 | 0      | 0      | 0.5992 | 0      |
| 2 | June  | 10 | ChildFeed | child | Bold | Bold | 2 | 3 | 2.3 | 2m3m10 | 2.2.3 | 0 | 25  | 39  | 0  | 86  | 92  | 242 | 0.1033 | 0.1612 | 0      | 0      | 0.3554 | 0.3802 |
| 2 | June  | 11 | ChildFeed | child | Bold | Bold | 1 | 3 | 2.3 | 2m3m11 | 2.1.3 | 0 | 31  | 72  | 22 | 112 | 0   | 237 | 0.1308 | 0.3038 | 0.0928 | 0.4726 | 0      | 0      |
| 2 | June  | 11 | ChildFeed | child | Bold | Bold | 2 | 3 | 2.3 | 2m3m11 | 2.2.3 | 0 | 19  | 64  | 0  | 154 | 0   | 237 | 0.0802 | 0.27   | 0      | 0      | 0.6498 | 0      |
| 2 | June  | 12 | ChildFeed | child | Bold | Bold | 1 | 3 | 2.3 | 2m3m12 | 2.1.3 | 0 | 0   | 155 | 0  | 66  | 0   | 221 | 0      | 0.7014 | 0      | 0      | 0.2986 | 0      |
| 2 | June  | 12 | ChildFeed | child | Bold | Bold | 2 | 3 | 2.3 | 2m3m12 | 2.2.3 | 0 | 8   | 72  | 0  | 13  | 128 | 221 | 0.0362 | 0.3258 | 0      | 0      | 0.0588 | 0.5792 |
| 2 | June  | 1  | ChildWalk | child | Bold | Bold | 1 | 4 | 2.4 | 2m4m1  | 2.1.4 | 0 | 0   | 147 | 0  | 0   | 0   | 147 | 0      | 1      | 0      | 0      | 0      | 0      |
| 2 | June  | 1  | ChildWalk | child | Bold | Bold | 2 | 4 | 2.4 | 2m4m1  | 2.2.4 | 0 | 11  | 109 | 0  | 0   | 27  | 147 | 0.0748 | 0.7415 | 0      | 0      | 0      | 0.1837 |
| 2 | June  | 2  | ChildWalk | child | Bold | Bold | 1 | 4 | 2.4 | 2m4m2  | 2.1.4 | 0 | 48  | 148 | 0  | 46  | 10  | 252 | 0.1905 | 0.5873 | 0      | 0      | 0.1825 | 0.0397 |
| 2 | June  | 2  | ChildWalk | child | Bold | Bold | 2 | 4 | 2.4 | 2m4m2  | 2.2.4 | 0 | 107 | 95  | 0  | 32  | 18  | 252 | 0.4246 | 0.377  | 0      | 0      | 0.127  | 0.0714 |
| 2 | June  | 3  | ChildWalk | child | Bold | Bold | 1 | 4 | 2.4 | 2m4m3  | 2.1.4 | 0 | 100 | 98  | 0  | 17  | 0   | 215 | 0.4651 | 0.4558 | 0      | 0      | 0.0791 | 0      |
| 2 | June  | 3  | ChildWalk | child | Bold | Bold | 2 | 4 | 2.4 | 2m4m3  | 2.2.4 | 0 | 73  | 79  | 15 | 48  | 0   | 215 | 0.3395 | 0.3674 | 0.0698 | 0.2233 | 0      | 0      |
| 2 | June  | 4  | ChildWalk | child | Bold | Bold | 1 | 4 | 2.4 | 2m4m4  | 2.1.4 | 0 | 143 | 46  | 0  | 46  | 0   | 235 | 0.6085 | 0.1957 | 0      | 0      | 0.1957 | 0      |
| 2 | June  | 4  | ChildWalk | child | Bold | Bold | 2 | 4 | 2.4 | 2m4m4  | 2.2.4 | 0 | 148 | 31  | 9  | 47  | 0   | 235 | 0.6298 | 0.1319 | 0.0383 | 0.2    | 0      | 0      |
| 2 | June  | 5  | ChildWalk | child |      |      |   |   |     |        |       |   |     |     |    |     |     |     |        |        |        |        |        |        |

|   |      |    |           |       |         |      |   |   |     |        |       |   |     |     |    |     |     |     |        |        |        |        |        |
|---|------|----|-----------|-------|---------|------|---|---|-----|--------|-------|---|-----|-----|----|-----|-----|-----|--------|--------|--------|--------|--------|
| 2 | June | 3  | ChildWalk | child | Bold    | Bold | 1 | 6 | 2.6 | 2m6m3  | 2.1.6 | 0 | 0   | 203 | 0  | 8   | 0   | 211 | 0      | 0.9621 | 0      | 0.0379 | 0      |
| 2 | June | 3  | ChildWalk | child | Bold    | Bold | 2 | 6 | 2.6 | 2m6m3  | 2.2.6 | 0 | 36  | 0   | 0  | 0   | 175 | 211 | 0.1706 | 0      | 0      | 0      | 0.8294 |
| 2 | June | 4  | ChildWalk | child | Bold    | Bold | 1 | 6 | 2.6 | 2m6m4  | 2.1.6 | 0 | 0   | 183 | 6  | 0   | 63  | 252 | 0      | 0.7262 | 0.0238 | 0      | 0.25   |
| 2 | June | 4  | ChildWalk | child | Bold    | Bold | 2 | 6 | 2.6 | 2m6m4  | 2.2.6 | 0 | 19  | 51  | 0  | 7   | 175 | 252 | 0.0754 | 0.2024 | 0      | 0.0278 | 0.6944 |
| 2 | June | 5  | ChildWalk | child | Bold    | Bold | 1 | 6 | 2.6 | 2m6m5  | 2.1.6 | 0 | 11  | 215 | 0  | 10  | 0   | 236 | 0.0466 | 0.911  | 0      | 0.0424 | 0      |
| 2 | June | 5  | ChildWalk | child | Bold    | Bold | 2 | 6 | 2.6 | 2m6m5  | 2.2.6 | 0 | 53  | 0   | 0  | 72  | 111 | 236 | 0.2246 | 0      | 0      | 0.3051 | 0.4703 |
| 3 | July | 1  | ChildFeed | child | Bold    | Bold | 1 | 1 | 3.1 | 3m1m1  | 3.1.1 | 0 | 9   | 109 | 11 | 26  | 62  | 217 | 0.0415 | 0.5023 | 0.0507 | 0.1198 | 0.2857 |
| 3 | July | 1  | ChildFeed | child | Bold    | Bold | 2 | 1 | 3.1 | 3m1m1  | 3.2.1 | 0 | 49  | 87  | 3  | 2   | 74  | 215 | 0.2279 | 0.4047 | 0.014  | 0.0093 | 0.3442 |
| 3 | July | 2  | ChildFeed | child | Bold    | Bold | 1 | 1 | 3.1 | 3m1m2  | 3.1.1 | 0 | 18  | 132 | 5  | 0   | 44  | 199 | 0.0905 | 0.6633 | 0.0251 | 0      | 0.2211 |
| 3 | July | 2  | ChildFeed | child | Bold    | Bold | 2 | 1 | 3.1 | 3m1m2  | 3.2.1 | 0 | 16  | 70  | 2  | 10  | 85  | 183 | 0.0874 | 0.3825 | 0.0109 | 0.0546 | 0.4645 |
| 3 | July | 3  | ChildFeed | child | Bold    | Bold | 1 | 1 | 3.1 | 3m1m3  | 3.1.1 | 0 | 0   | 180 | 3  | 0   | 22  | 205 | 0      | 0.878  | 0.0146 | 0      | 0.1073 |
| 3 | July | 3  | ChildFeed | child | Bold    | Bold | 2 | 1 | 3.1 | 3m1m3  | 3.2.1 | 0 | 11  | 176 | 0  | 9   | 10  | 206 | 0.0534 | 0.8544 | 0      | 0.0437 | 0.0485 |
| 3 | July | 4  | ChildFeed | child | Bold    | Bold | 1 | 1 | 3.1 | 3m1m4  | 3.1.1 | 0 | 51  | 107 | 10 | 7   | 58  | 233 | 0.2189 | 0.4592 | 0.0429 | 0.03   | 0.2489 |
| 3 | July | 4  | ChildFeed | child | Bold    | Bold | 2 | 1 | 3.1 | 3m1m4  | 3.2.1 | 0 | 73  | 105 | 15 | 17  | 0   | 210 | 0.3476 | 0.5    | 0.0714 | 0.081  | 0      |
| 3 | July | 5  | ChildFeed | child | Bold    | Bold | 1 | 1 | 3.1 | 3m1m5  | 3.1.1 | 0 | 47  | 224 | 4  | 0   | 0   | 275 | 0.1709 | 0.8145 | 0.0145 | 0      | 0      |
| 3 | July | 5  | ChildFeed | child | Bold    | Bold | 2 | 1 | 3.1 | 3m1m5  | 3.2.1 | 0 | 17  | 234 | 4  | 0   | 20  | 275 | 0.0618 | 0.8509 | 0.0145 | 0      | 0.0727 |
| 3 | July | 1  | ChildFeed | child | Bold    | Bold | 1 | 2 | 3.2 | 3m2m1  | 3.1.2 | 0 | 67  | 80  | 0  | 37  | 44  | 228 | 0.2939 | 0.3509 | 0      | 0.1623 | 0.193  |
| 3 | July | 1  | ChildFeed | child | Bold    | Bold | 2 | 2 | 3.2 | 3m2m1  | 3.2.2 | 0 | 74  | 50  | 0  | 25  | 79  | 228 | 0.3246 | 0.2193 | 0      | 0.1096 | 0.3465 |
| 3 | July | 2  | ChildFeed | child | Bold    | Bold | 1 | 2 | 3.2 | 3m2m2  | 3.1.2 | 0 | 109 | 128 | 3  | 21  | 36  | 297 | 0.367  | 0.431  | 0.0101 | 0.0707 | 0.1212 |
| 3 | July | 2  | ChildFeed | child | Bold    | Bold | 2 | 2 | 3.2 | 3m2m2  | 3.2.2 | 0 | 90  | 130 | 0  | 22  | 55  | 297 | 0.303  | 0.4377 | 0      | 0.0741 | 0.1852 |
| 3 | July | 3  | ChildFeed | child | Bold    | Bold | 1 | 2 | 3.2 | 3m2m3  | 3.1.2 | 0 | 51  | 102 | 15 | 28  | 108 | 304 | 0.1678 | 0.3355 | 0.0493 | 0.0921 | 0.3553 |
| 3 | July | 3  | ChildFeed | child | Bold    | Bold | 2 | 2 | 3.2 | 3m2m3  | 3.2.2 | 0 | 59  | 160 | 10 | 51  | 24  | 304 | 0.1941 | 0.5263 | 0.0329 | 0.1678 | 0.0789 |
| 3 | July | 4  | ChildFeed | child | Bold    | Bold | 1 | 2 | 3.2 | 3m2m4  | 3.1.2 | 0 | 100 | 117 | 8  | 54  | 29  | 308 | 0.3247 | 0.3799 | 0.026  | 0.1753 | 0.0942 |
| 3 | July | 4  | ChildFeed | child | Bold    | Bold | 2 | 2 | 3.2 | 3m2m4  | 3.2.2 | 0 | 132 | 98  | 0  | 59  | 19  | 308 | 0.4286 | 0.3182 | 0      | 0.1916 | 0.0617 |
| 3 | July | 5  | ChildFeed | child | Bold    | Bold | 1 | 2 | 3.2 | 3m2m5  | 3.1.2 | 0 | 69  | 159 | 4  | 14  | 0   | 246 | 0.2805 | 0.6463 | 0.0163 | 0.0569 | 0      |
| 3 | July | 5  | ChildFeed | child | Bold    | Bold | 2 | 2 | 3.2 | 3m2m5  | 3.2.2 | 0 | 127 | 111 | 0  | 22  | 0   | 260 | 0.4885 | 0.4269 | 0      | 0.0846 | 0      |
| 3 | July | 8  | ChildFeed | child | Bold    | Bold | 1 | 2 | 3.2 | 3m2m8  | 3.1.2 | 0 | 116 | 51  | 0  | 63  | 20  | 250 | 0.464  | 0.204  | 0      | 0.252  | 0.08   |
| 3 | July | 8  | ChildFeed | child | Bold    | Bold | 2 | 2 | 3.2 | 3m2m8  | 3.2.2 | 0 | 136 | 23  | 0  | 48  | 43  | 250 | 0.544  | 0.092  | 0      | 0.192  | 0.172  |
| 3 | July | 10 | ChildFeed | child | Bold    | Bold | 1 | 2 | 3.2 | 3m2m10 | 3.1.2 | 0 | 114 | 117 | 4  | 46  | 4   | 285 | 0.4    | 0.4105 | 0.014  | 0.1614 | 0.014  |
| 3 | July | 10 | ChildFeed | child | Bold    | Bold | 2 | 2 | 3.2 | 3m2m10 | 3.2.2 | 0 | 58  | 101 | 20 | 106 | 0   | 285 | 0.2035 | 0.3544 | 0.0702 | 0.3719 | 0      |
| 3 | July | 11 | ChildFeed | child | Bold    | Bold | 1 | 2 | 3.2 | 3m2m11 | 3.1.2 | 0 | 54  | 153 | 0  | 64  | 0   | 271 | 0.1993 | 0.5646 | 0      | 0.2362 | 0      |
| 3 | July | 11 | ChildFeed | child | Bold    | Bold | 2 | 2 | 3.2 | 3m2m11 | 3.2.2 | 0 | 108 | 98  | 8  | 57  | 0   | 271 | 0.3985 | 0.3616 | 0.0295 | 0.2103 | 0      |
| 3 | July | 12 | ChildFeed | child | Bold    | Bold | 1 | 2 | 3.2 | 3m2m12 | 3.1.2 | 0 | 104 | 113 | 0  | 34  | 25  | 276 | 0.3768 | 0.4094 | 0      | 0.1232 | 0.0906 |
| 3 | July | 12 | ChildFeed | child | Bold    | Bold | 2 | 2 | 3.2 | 3m2m12 | 3.2.2 | 0 | 81  | 119 | 0  | 56  | 20  | 276 | 0.2935 | 0.4312 | 0      | 0.2029 | 0.0725 |
| 3 | July | 1  | ChildFeed | child | Bold    | Bold | 1 | 3 | 3.3 | 3m3m1  | 3.1.3 | 0 | 15  | 130 | 2  | 15  | 49  | 211 | 0.0711 | 0.6161 | 0.0095 | 0.0711 | 0.2322 |
| 3 | July | 1  | ChildFeed | child | Bold    | Bold | 2 | 3 | 3.3 | 3m3m1  | 3.2.3 | 0 | 2   | 131 | 2  | 13  | 80  | 228 | 0.0088 | 0.5746 | 0.0088 | 0.057  | 0.3509 |
| 3 | July | 2  | ChildFeed | child | Bold    | Bold | 1 | 3 | 3.3 | 3m3m2  | 3.1.3 | 0 | 11  | 145 | 0  | 10  | 49  | 215 | 0.0512 | 0.6744 | 0      | 0.0465 | 0.2279 |
| 3 | July | 2  | ChildFeed | child | Bold    | Bold | 2 | 3 | 3.3 | 3m3m2  | 3.2.3 | 0 | 28  | 88  | 0  | 3   | 49  | 168 | 0.1667 | 0.5238 | 0      | 0.0179 | 0.2917 |
| 3 | July | 3  | ChildFeed | child | Bold    | Bold | 1 | 3 | 3.3 | 3m3m3  | 3.1.3 | 0 | 24  | 76  | 0  | 5   | 0   | 105 | 0.2286 | 0.7238 | 0      | 0.0476 | 0      |
| 3 | July | 3  | ChildFeed | child | Bold    | Bold | 2 | 3 | 3.3 | 3m3m3  | 3.2.3 | 0 | 27  | 54  | 2  | 0   | 32  | 115 | 0.2348 | 0.4696 | 0.0174 | 0      | 0.2783 |
| 3 | July | 4  | ChildFeed | child | Bold    | Bold | 1 | 3 | 3.3 | 3m3m4  | 3.1.3 | 0 | 0   | 80  | 4  | 0   | 11  | 95  | 0      | 0.8421 | 0.0421 | 0      | 0.1158 |
| 3 | July | 4  | ChildFeed | child | Bold    | Bold | 2 | 3 | 3.3 | 3m3m4  | 3.2.3 | 0 | 29  | 102 | 0  | 16  | 27  | 174 | 0.1667 | 0.5862 | 0      | 0.092  | 0.1552 |
| 3 | July | 5  | ChildFeed | child | Bold    | Bold | 1 | 3 | 3.3 | 3m3m5  | 3.1.3 | 0 | 15  | 110 | 13 | 32  | 18  | 188 | 0.0798 | 0.5851 | 0.0691 | 0.1702 | 0.0957 |
| 3 | July | 5  | ChildFeed | child | Bold    | Bold | 2 | 3 | 3.3 | 3m3m5  | 3.2.3 | 0 | 18  | 150 | 18 | 32  | 0   | 218 | 0.0826 | 0.6881 | 0.0826 | 0.1468 | 0      |
| 3 | July | 1  | ChildWalk | child | Bold    | Bold | 1 | 4 | 3.4 | 3m4m1  | 3.1.4 | 0 | 63  | 84  | 0  | 34  | 44  | 225 | 0.28   | 0.3733 | 0      | 0.1511 | 0.1956 |
| 3 | July | 1  | ChildWalk | child | Bold    | Bold | 2 | 4 | 3.4 | 3m4m1  | 3.2.4 | 0 | 0   | 221 | 0  | 0   | 4   | 225 | 0      | 0.9822 | 0      | 0      | 0.0178 |
| 3 | July | 2  | ChildWalk | child | Bold    | Bold | 1 | 4 | 3.4 | 3m4m2  | 3.1.4 | 0 | 6   | 107 | 11 | 24  | 105 | 253 | 0.0237 | 0.4229 | 0.0435 | 0.0949 | 0.415  |
| 3 | July | 2  | ChildWalk | child | Bold    | Bold | 2 | 4 | 3.4 | 3m4m2  | 3.2.4 | 0 | 5   | 182 | 2  | 14  | 50  | 253 | 0.0198 | 0.7194 | 0.0079 | 0.0553 | 0.1976 |
| 3 | July | 3  | ChildWalk | child | Bold    | Bold | 1 | 4 | 3.4 | 3m4m3  | 3.1.4 | 0 | 6   | 214 | 0  | 24  | 15  | 259 | 0.0232 | 0.8263 | 0      | 0.0927 | 0.0579 |
| 3 | July | 3  | ChildWalk | child | Bold    | Bold | 2 | 4 | 3.4 | 3m4m3  | 3.2.4 | 0 | 0   | 245 | 3  | 0   | 11  | 259 | 0      | 0.9459 | 0.0116 | 0      | 0.0425 |
| 3 | July | 4  | ChildWalk | child | Bold    | Bold | 1 | 4 | 3.4 | 3m4m4  | 3.1.4 | 0 | 0   | 300 | 0  | 0   | 0   | 300 | 0      | 1      | 0      | 0      | 0      |
| 3 | July | 4  | ChildWalk | child | Bold    | Bold | 2 | 4 | 3.4 | 3m4m4  | 3.2.4 | 0 | 0   | 300 | 0  | 0   | 0   | 300 | 0      | 1      | 0      | 0      | 0      |
| 3 | July | 5  | ChildWalk | child | Bold    | Bold | 1 | 4 | 3.4 | 3m4m5  | 3.1.4 | 0 | 9   | 223 | 49 | 8   | 0   | 289 | 0.0311 | 0.7716 | 0.1696 | 0.0277 | 0      |
| 3 | July | 5  | ChildWalk | child | Bold    | Bold | 2 | 4 | 3.4 | 3m4m5  | 3.2.4 | 0 | 14  | 222 | 33 | 20  | 0   | 289 | 0.0484 | 0.7682 | 0.1142 | 0.0692 | 0      |
| 3 | July | 12 | ChildWalk | child | Bold    | Bold | 1 | 4 | 3.4 | 3m4m12 | 3.1.4 | 0 | 0   | 7   | 0  | 309 | 0   | 316 | 0      | 0.0222 | 0      | 0.9778 | 0      |
| 3 | July | 12 | ChildWalk | child | Bold    | Bold | 2 | 4 | 3.4 | 3m4m12 | 3.2.4 | 0 | 0   | 0   | 0  | 316 | 0   | 316 | 0      | 0      | 0      | 1      | 0      |
| 3 | July | 1  | ChildWalk | child | boldshy | Bold | 1 | 5 | 3.5 | 3m5m1  | 3.1.5 | 0 | 0   | 214 | 0  | 11  | 27  | 252 | 0      | 0.8492 | 0      | 0.0437 | 0.1071 |
| 3 | July | 1  | ChildWalk | child | boldshy | Bold | 2 | 5 | 3.5 | 3m5m1  | 3.2.5 | 0 | 0   | 77  | 0  | 5   | 170 | 252 | 0      | 0.3056 | 0      | 0.0198 | 0.6746 |
| 3 | July | 2  | ChildWalk | child | boldshy | Bold | 1 | 5 | 3.5 | 3m5m2  | 3.1.5 | 0 | 0   | 39  | 0  | 39  | 185 | 263 | 0      | 0.1483 | 0      | 0.1483 | 0.7034 |
| 3 | July | 2  | ChildWalk | child | boldshy | Bold | 2 | 5 | 3.5 | 3m5m2  | 3.2.5 | 0 | 5   | 114 | 21 | 43  | 80  | 263 | 0.019  | 0.4335 | 0.0798 | 0.1635 | 0.3042 |
| 3 | July | 3  | ChildWalk | child | boldshy | Bold | 1 | 5 | 3.5 | 3m5m3  | 3.1.5 | 0 | 0   | 173 | 43 | 28  | 24  | 268 | 0      | 0.6455 | 0.1604 | 0.1045 | 0.0896 |
| 3 | July | 3  | ChildWalk | child | boldshy | Bold | 2 | 5 | 3.5 | 3m5m3  | 3.2.5 | 0 | 6   | 90  | 0  | 56  | 116 | 268 | 0.0224 | 0.3358 | 0      | 0.209  | 0.4328 |
| 3 | July | 4  | ChildWalk | child | boldshy | Bold | 1 | 5 | 3.5 | 3m5m4  | 3.1.5 | 0 | 0   | 75  | 15 | 65  | 109 | 264 | 0      | 0.2841 | 0.0568 | 0.2462 | 0.4129 |
| 3 | July | 4  | ChildWalk | child | boldshy | Bold | 2 | 5 | 3.5 | 3m5m4  | 3.2.5 | 0 | 0   | 28  | 5  | 164 | 67  | 264 | 0      | 0.1061 | 0.0189 | 0.6212 | 0.2538 |
| 3 | July | 5  | ChildWalk | child | boldshy | Bold | 1 | 5 | 3.5 | 3m5m5  | 3.1.5 | 0 | 36  | 8   | 35 | 227 | 0   | 306 | 0.1176 | 0.0261 | 0.1144 | 0.7418 | 0      |
| 3 | July | 5  | ChildWalk | child | boldshy | Bold | 2 | 5 | 3.5 | 3m5m5  | 3.2.5 | 0 | 0   | 0   | 0  | 306 | 0   | 306 | 0      | 0      | 0      | 1      | 0      |
| 3 | July | 9  | ChildWalk | child | boldshy | Bold | 1 | 5 | 3.5 | 3m5m9  | 3.1.5 | 0 | 0   | 0   | 0  | 307 | 0   | 307 | 0      | 0      | 0      | 1      | 0      |
| 3 |      |    |           |       |         |      |   |   |     |        |       |   |     |     |    |     |     |     |        |        |        |        |        |

|   |        |    |      |       |      |      |   |   |     |        |       |   |     |     |    |     |     |     |        |        |        |        |        |
|---|--------|----|------|-------|------|------|---|---|-----|--------|-------|---|-----|-----|----|-----|-----|-----|--------|--------|--------|--------|--------|
| 4 | August | 2  | Dog  | adult | Bold | Bold | 2 | 1 | 4.1 | 4m1m2  | 4.2.1 | 0 | 20  | 11  | 0  | 4   | 156 | 191 | 0.1047 | 0.0576 | 0      | 0.0209 | 0.8168 |
| 4 | August | 3  | Dog  | adult | Bold | Bold | 1 | 1 | 4.1 | 4m1m3  | 4.1.1 | 0 | 45  | 141 | 24 | 33  | 11  | 254 | 0.1772 | 0.5551 | 0.0945 | 0.1299 | 0.0433 |
| 4 | August | 3  | Dog  | adult | Bold | Bold | 2 | 1 | 4.1 | 4m1m3  | 4.2.1 | 0 | 62  | 21  | 6  | 13  | 152 | 254 | 0.2441 | 0.0827 | 0.0236 | 0.0512 | 0.5984 |
| 4 | August | 4  | Dog  | adult | Bold | Bold | 1 | 1 | 4.1 | 4m1m4  | 4.1.1 | 0 | 32  | 47  | 0  | 29  | 129 | 237 | 0.135  | 0.1983 | 0      | 0.1224 | 0.5443 |
| 4 | August | 4  | Dog  | adult | Bold | Bold | 2 | 1 | 4.1 | 4m1m4  | 4.2.1 | 0 | 13  | 73  | 13 | 6   | 132 | 237 | 0.0549 | 0.308  | 0.0549 | 0.0253 | 0.557  |
| 4 | August | 5  | Dog  | adult | Bold | Bold | 1 | 1 | 4.1 | 4m1m5  | 4.1.1 | 0 | 111 | 74  | 23 | 5   | 32  | 245 | 0.4531 | 0.302  | 0.0939 | 0.0204 | 0.1306 |
| 4 | August | 5  | Dog  | adult | Bold | Bold | 2 | 1 | 4.1 | 4m1m5  | 4.2.1 | 0 | 160 | 27  | 0  | 26  | 32  | 245 | 0.6531 | 0.1102 | 0      | 0.1061 | 0.1306 |
| 4 | August | 8  | Dog  | adult | Bold | Bold | 2 | 1 | 4.1 | 4m1m8  | 4.2.1 | 0 | 15  | 18  | 0  | 0   | 198 | 231 | 0.0649 | 0.0779 | 0      | 0      | 0.8571 |
| 4 | August | 9  | Dog  | adult | Bold | Bold | 2 | 1 | 4.1 | 4m1m9  | 4.2.1 | 0 | 55  | 50  | 5  | 101 | 30  | 241 | 0.2282 | 0.2075 | 0.0207 | 0.4191 | 0.1245 |
| 4 | August | 10 | Dog  | adult | Bold | Bold | 2 | 1 | 4.1 | 4m1m10 | 4.2.1 | 0 | 61  | 0   | 13 | 5   | 123 | 202 | 0.302  | 0      | 0.0644 | 0.0248 | 0.6089 |
| 4 | August | 11 | Dog  | adult | Bold | Bold | 2 | 1 | 4.1 | 4m1m11 | 4.2.1 | 0 | 7   | 21  | 16 | 0   | 179 | 223 | 0.0314 | 0.0942 | 0.0717 | 0      | 0.8027 |
| 4 | August | 12 | Dog  | adult | Bold | Bold | 2 | 1 | 4.1 | 4m1m12 | 4.2.1 | 0 | 27  | 86  | 10 | 19  | 100 | 242 | 0.1116 | 0.3554 | 0.0413 | 0.0785 | 0.4132 |
| 4 | August | 1  | Dog  | adult | Bold | Bold | 1 | 2 | 4.2 | 4m2m1  | 4.1.2 | 0 | 85  | 20  | 0  | 35  | 75  | 215 | 0.3953 | 0.093  | 0      | 0.1628 | 0.3488 |
| 4 | August | 1  | Dog  | adult | Bold | Bold | 2 | 2 | 4.2 | 4m2m1  | 4.2.2 | 0 | 33  | 9   | 0  | 46  | 127 | 215 | 0.1535 | 0.0419 | 0      | 0.214  | 0.5907 |
| 4 | August | 2  | Dog  | adult | Bold | Bold | 1 | 2 | 4.2 | 4m2m2  | 4.1.2 | 0 | 56  | 34  | 0  | 54  | 87  | 231 | 0.2424 | 0.1472 | 0      | 0.2338 | 0.3766 |
| 4 | August | 2  | Dog  | adult | Bold | Bold | 2 | 2 | 4.2 | 4m2m2  | 4.2.2 | 0 | 162 | 0   | 0  | 5   | 64  | 231 | 0.7013 | 0      | 0      | 0.0216 | 0.2771 |
| 4 | August | 3  | Dog  | adult | Bold | Bold | 1 | 2 | 4.2 | 4m2m3  | 4.1.2 | 0 | 91  | 34  | 0  | 40  | 81  | 246 | 0.3699 | 0.1382 | 0      | 0.1626 | 0.3293 |
| 4 | August | 3  | Dog  | adult | Bold | Bold | 2 | 2 | 4.2 | 4m2m3  | 4.2.2 | 0 | 120 | 5   | 0  | 11  | 110 | 246 | 0.4878 | 0.0203 | 0      | 0.0447 | 0.4472 |
| 4 | August | 4  | Dog  | adult | Bold | Bold | 1 | 2 | 4.2 | 4m2m4  | 4.1.2 | 0 | 11  | 23  | 0  | 15  | 174 | 223 | 0.0493 | 0.1031 | 0      | 0.0673 | 0.7803 |
| 4 | August | 4  | Dog  | adult | Bold | Bold | 2 | 2 | 4.2 | 4m2m4  | 4.2.2 | 0 | 6   | 6   | 0  | 0   | 211 | 223 | 0.0269 | 0.0269 | 0      | 0      | 0.9462 |
| 4 | August | 5  | Dog  | adult | Bold | Bold | 1 | 2 | 4.2 | 4m2m5  | 4.1.2 | 0 | 50  | 0   | 0  | 0   | 176 | 226 | 0.2212 | 0      | 0      | 0      | 0.7788 |
| 4 | August | 5  | Dog  | adult | Bold | Bold | 2 | 2 | 4.2 | 4m2m5  | 4.2.2 | 0 | 116 | 0   | 0  | 0   | 110 | 226 | 0.5133 | 0      | 0      | 0      | 0.4867 |
| 4 | August | 8  | Dog  | adult | Bold | Bold | 1 | 2 | 4.2 | 4m2m8  | 4.1.2 | 0 | 27  | 8   | 0  | 6   | 168 | 209 | 0.1292 | 0.0383 | 0      | 0.0287 | 0.8038 |
| 4 | August | 8  | Dog  | adult | Bold | Bold | 2 | 2 | 4.2 | 4m2m8  | 4.2.2 | 0 | 40  | 9   | 0  | 14  | 146 | 209 | 0.1914 | 0.0431 | 0      | 0.067  | 0.6986 |
| 4 | August | 9  | Dog  | adult | Bold | Bold | 1 | 2 | 4.2 | 4m2m9  | 4.1.2 | 0 | 110 | 0   | 0  | 0   | 112 | 222 | 0.4955 | 0      | 0      | 0      | 0.5045 |
| 4 | August | 9  | Dog  | adult | Bold | Bold | 2 | 2 | 4.2 | 4m2m9  | 4.2.2 | 0 | 105 | 0   | 0  | 0   | 117 | 222 | 0.473  | 0      | 0      | 0      | 0.527  |
| 4 | August | 10 | Dog  | adult | Bold | Bold | 1 | 2 | 4.2 | 4m2m10 | 4.1.2 | 0 | 30  | 24  | 0  | 21  | 145 | 220 | 0.1364 | 0.1091 | 0      | 0.0955 | 0.6591 |
| 4 | August | 10 | Dog  | adult | Bold | Bold | 2 | 2 | 4.2 | 4m2m10 | 4.2.2 | 0 | 14  | 0   | 0  | 0   | 206 | 220 | 0.0636 | 0      | 0      | 0      | 0.9364 |
| 4 | August | 11 | Dog  | adult | Bold | Bold | 1 | 2 | 4.2 | 4m2m11 | 4.1.2 | 0 | 83  | 3   | 9  | 0   | 128 | 223 | 0.3722 | 0.0135 | 0.0404 | 0      | 0.574  |
| 4 | August | 11 | Dog  | adult | Bold | Bold | 2 | 2 | 4.2 | 4m2m11 | 4.2.2 | 0 | 42  | 0   | 0  | 5   | 176 | 223 | 0.1883 | 0      | 0      | 0.0224 | 0.7892 |
| 4 | August | 1  | Feed | adult | Bold | Bold | 1 | 3 | 4.3 | 4m3m1  | 4.1.3 | 0 | 9   | 160 | 2  | 0   | 0   | 171 | 0.0526 | 0.9357 | 0.0117 | 0      | 0      |
| 4 | August | 1  | Feed | adult | Bold | Bold | 2 | 3 | 4.3 | 4m3m1  | 4.2.3 | 0 | 44  | 103 | 0  | 0   | 31  | 178 | 0.2472 | 0.5787 | 0      | 0      | 0.1742 |
| 4 | August | 2  | Feed | adult | Bold | Bold | 1 | 3 | 4.3 | 4m3m2  | 4.1.3 | 0 | 30  | 142 | 3  | 0   | 19  | 194 | 0.1546 | 0.732  | 0.0155 | 0      | 0.0979 |
| 4 | August | 2  | Feed | adult | Bold | Bold | 2 | 3 | 4.3 | 4m3m2  | 4.2.3 | 0 | 0   | 201 | 0  | 0   | 0   | 201 | 0      | 1      | 0      | 0      | 0      |
| 4 | August | 3  | Feed | adult | Bold | Bold | 1 | 3 | 4.3 | 4m3m3  | 4.1.3 | 0 | 24  | 110 | 10 | 0   | 53  | 197 | 0.1218 | 0.5584 | 0.0508 | 0      | 0.269  |
| 4 | August | 3  | Feed | adult | Bold | Bold | 2 | 3 | 4.3 | 4m3m3  | 4.2.3 | 0 | 12  | 123 | 6  | 0   | 60  | 201 | 0.0597 | 0.6119 | 0.0299 | 0      | 0.2985 |
| 4 | August | 4  | Feed | adult | Bold | Bold | 1 | 3 | 4.3 | 4m3m4  | 4.1.3 | 0 | 18  | 74  | 25 | 0   | 21  | 138 | 0.1304 | 0.5362 | 0.1812 | 0      | 0.1522 |
| 4 | August | 4  | Feed | adult | Bold | Bold | 2 | 3 | 4.3 | 4m3m4  | 4.2.3 | 0 | 9   | 23  | 36 | 0   | 17  | 85  | 0.1059 | 0.2706 | 0.4235 | 0      | 0.2    |
| 4 | August | 5  | Feed | adult | Bold | Bold | 1 | 3 | 4.3 | 4m3m5  | 4.1.3 | 0 | 30  | 90  | 12 | 37  | 13  | 182 | 0.1648 | 0.4945 | 0.0659 | 0.2033 | 0.0714 |
| 4 | August | 5  | Feed | adult | Bold | Bold | 2 | 3 | 4.3 | 4m3m5  | 4.2.3 | 0 | 13  | 58  | 12 | 9   | 19  | 111 | 0.1171 | 0.5225 | 0.1081 | 0.0811 | 0.1712 |
| 4 | August | 1  | Feed | adult | Bold | Bold | 1 | 4 | 4.4 | 4m4m1  | 4.1.4 | 0 | 71  | 41  | 0  | 13  | 67  | 192 | 0.3698 | 0.2135 | 0      | 0.0677 | 0.349  |
| 4 | August | 1  | Feed | adult | Bold | Bold | 2 | 4 | 4.4 | 4m4m1  | 4.2.4 | 0 | 78  | 10  | 0  | 36  | 68  | 192 | 0.4063 | 0.0521 | 0      | 0.1875 | 0.3542 |
| 4 | August | 2  | Feed | adult | Bold | Bold | 1 | 4 | 4.4 | 4m4m2  | 4.1.4 | 0 | 59  | 57  | 0  | 90  | 44  | 250 | 0.236  | 0.228  | 0      | 0.36   | 0.176  |
| 4 | August | 2  | Feed | adult | Bold | Bold | 2 | 4 | 4.4 | 4m4m2  | 4.2.4 | 0 | 25  | 35  | 0  | 43  | 147 | 250 | 0.1    | 0.14   | 0      | 0.172  | 0.588  |
| 4 | August | 3  | Feed | adult | Bold | Bold | 1 | 4 | 4.4 | 4m4m3  | 4.1.4 | 0 | 61  | 46  | 0  | 37  | 71  | 215 | 0.2837 | 0.214  | 0      | 0.1721 | 0.3302 |
| 4 | August | 3  | Feed | adult | Bold | Bold | 2 | 4 | 4.4 | 4m4m3  | 4.2.4 | 0 | 129 | 26  | 0  | 34  | 81  | 270 | 0.4778 | 0.0963 | 0      | 0.1259 | 0.3    |
| 4 | August | 4  | Feed | adult | Bold | Bold | 1 | 4 | 4.4 | 4m4m4  | 4.1.4 | 0 | 20  | 65  | 0  | 13  | 40  | 138 | 0.1449 | 0.471  | 0      | 0.0942 | 0.2899 |
| 4 | August | 4  | Feed | adult | Bold | Bold | 2 | 4 | 4.4 | 4m4m4  | 4.2.4 | 0 | 88  | 41  | 0  | 12  | 96  | 237 | 0.3713 | 0.173  | 0      | 0.0506 | 0.4051 |
| 4 | August | 5  | Feed | adult | Bold | Bold | 1 | 4 | 4.4 | 4m4m5  | 4.1.4 | 0 | 16  | 115 | 0  | 14  | 0   | 145 | 0.1103 | 0.7931 | 0      | 0.0966 | 0      |
| 4 | August | 5  | Feed | adult | Bold | Bold | 2 | 4 | 4.4 | 4m4m5  | 4.2.4 | 0 | 74  | 0   | 0  | 31  | 169 | 274 | 0.2701 | 0      | 0      | 0.1131 | 0.6168 |
| 4 | August | 8  | Feed | adult | Bold | Bold | 1 | 4 | 4.4 | 4m4m8  | 4.1.4 | 0 | 15  | 93  | 0  | 0   | 106 | 214 | 0.0701 | 0.4346 | 0      | 0      | 0.4953 |
| 4 | August | 8  | Feed | adult | Bold | Bold | 2 | 4 | 4.4 | 4m4m8  | 4.2.4 | 0 | 9   | 52  | 0  | 4   | 149 | 214 | 0.0421 | 0.243  | 0      | 0.0187 | 0.6963 |
| 4 | August | 9  | Feed | adult | Bold | Bold | 1 | 4 | 4.4 | 4m4m9  | 4.1.4 | 0 | 52  | 47  | 0  | 3   | 106 | 208 | 0.25   | 0.226  | 0      | 0.0144 | 0.5096 |
| 4 | August | 9  | Feed | adult | Bold | Bold | 2 | 4 | 4.4 | 4m4m9  | 4.2.4 | 0 | 62  | 31  | 0  | 4   | 111 | 208 | 0.2981 | 0.149  | 0      | 0.0192 | 0.5337 |
| 4 | August | 10 | Feed | adult | Bold | Bold | 1 | 4 | 4.4 | 4m4m10 | 4.1.4 | 0 | 31  | 93  | 0  | 45  | 41  | 210 | 0.1476 | 0.4429 | 0      | 0.2143 | 0.1952 |
| 4 | August | 10 | Feed | adult | Bold | Bold | 2 | 4 | 4.4 | 4m4m10 | 4.2.4 | 0 | 9   | 27  | 0  | 0   | 174 | 210 | 0.0429 | 0.1286 | 0      | 0      | 0.8286 |
| 4 | August | 11 | Feed | adult | Bold | Bold | 1 | 4 | 4.4 | 4m4m11 | 4.1.4 | 0 | 5   | 57  | 0  | 50  | 103 | 215 | 0.0233 | 0.2651 | 0      | 0.2326 | 0.4791 |
| 4 | August | 11 | Feed | adult | Bold | Bold | 2 | 4 | 4.4 | 4m4m11 | 4.2.4 | 0 | 24  | 18  | 0  | 52  | 121 | 215 | 0.1116 | 0.0837 | 0      | 0.2419 | 0.5628 |
| 4 | August | 12 | Feed | adult | Bold | Bold | 1 | 4 | 4.4 | 4m4m12 | 4.1.4 | 0 | 73  | 87  | 0  | 44  | 22  | 226 | 0.323  | 0.385  | 0      | 0.1947 | 0.0973 |
| 4 | August | 12 | Feed | adult | Bold | Bold | 2 | 4 | 4.4 | 4m4m12 | 4.2.4 | 0 | 34  | 81  | 0  | 36  | 75  | 226 | 0.1504 | 0.3584 | 0      | 0.1593 | 0.3319 |
| 4 | August | 1  | Walk | adult | Bold | Bold | 1 | 5 | 4.5 | 4m5m1  | 4.1.5 | 0 | 32  | 153 | 0  | 42  | 0   | 227 | 0.141  | 0.674  | 0      | 0.185  | 0      |
| 4 | August | 1  | Walk | adult | Bold | Bold | 2 | 5 | 4.5 | 4m5m1  | 4.2.5 | 0 | 19  | 12  | 0  | 7   | 189 | 227 | 0.0837 | 0.0529 | 0      | 0.0308 | 0.8326 |
| 4 | August | 2  | Walk | adult | Bold | Bold | 1 | 5 | 4.5 | 4m5m2  | 4.1.5 | 0 | 62  | 100 | 14 | 7   | 33  | 216 | 0.287  | 0.463  | 0.0648 | 0.0324 | 0.1528 |
| 4 | August | 2  | Walk | adult | Bold | Bold | 2 | 5 | 4.5 | 4m5m2  | 4.2.5 | 0 | 25  | 47  | 0  | 54  | 90  | 216 | 0.1157 | 0.2176 | 0      | 0.25   | 0.4167 |
| 4 | August | 3  | Walk | adult | Bold | Bold | 1 | 5 | 4.5 | 4m5m3  | 4.1.5 | 0 | 21  | 138 | 11 | 11  | 44  | 225 | 0.0933 | 0.6133 | 0.0489 | 0.0489 | 0.1956 |
| 4 | August | 3  | Walk | adult | Bold | Bold | 2 | 5 | 4.5 | 4m5m3  | 4.2.5 | 0 | 40  | 0   | 0  | 36  | 149 | 225 | 0.1778 | 0      | 0      | 0.16   | 0.6622 |
| 4 | August | 4  | Walk | adult | Bold | Bold | 1 | 5 | 4.5 | 4m5m4  | 4.1.5 | 0 | 0   | 243 | 0  | 0   | 0   | 243 | 0      | 1      | 0      | 0      | 0      |
| 4 | August | 4  | Walk | adult | Bold | Bold | 2 | 5 | 4.5 | 4m5m4  |       |   |     |     |    |     |     |     |        |        |        |        |        |

|   |          |    |      |       |      |      |   |   |     |        |       |   |     |     |    |     |     |     |        |        |        |        |        |        |   |
|---|----------|----|------|-------|------|------|---|---|-----|--------|-------|---|-----|-----|----|-----|-----|-----|--------|--------|--------|--------|--------|--------|---|
| 4 | August   | 10 | Walk | adult | Bold | Bold | 2 | 7 | 4.7 | 4m7m10 | 4.2.7 | 0 | 9   | 0   | 0  | 0   | 210 | 219 | 0.0411 | 0      | 0      | 0      | 0      | 0.9589 |   |
| 4 | August   | 11 | Walk | adult | Bold | Bold | 1 | 7 | 4.7 | 4m7m11 | 4.1.7 | 0 | 9   | 5   | 0  | 0   | 205 | 219 | 0.0411 | 0.0228 | 0      | 0      | 0      | 0.9361 |   |
| 4 | August   | 11 | Walk | adult | Bold | Bold | 2 | 7 | 4.7 | 4m7m11 | 4.2.7 | 0 | 13  | 0   | 0  | 0   | 206 | 219 | 0.0594 | 0      | 0      | 0      | 0      | 0.9406 |   |
| 4 | August   | 12 | Walk | adult | Bold | Bold | 1 | 7 | 4.7 | 4m7m12 | 4.1.7 | 0 | 21  | 0   | 0  | 0   | 207 | 228 | 0.0921 | 0      | 0      | 0      | 0      | 0.9079 |   |
| 4 | August   | 12 | Walk | adult | Bold | Bold | 2 | 7 | 4.7 | 4m7m12 | 4.2.7 | 0 | 20  | 0   | 0  | 22  | 186 | 228 | 0.0877 | 0      | 0      | 0      | 0.0965 | 0.8158 |   |
| 5 | septembe | 1  | Dog  | adult | Bold | Bold | 1 | 1 | 5.1 | 5m1m1  | 5.1.1 | 0 | 0   | 188 | 0  | 8   | 23  | 219 | 0      | 0.8584 | 0      | 0      | 0.0365 | 0.105  |   |
| 5 | septembe | 1  | Dog  | adult | Bold | Bold | 2 | 1 | 5.1 | 5m1m1  | 5.2.1 | 0 | 1   | 0   | 0  | 0   | 218 | 219 | 0.0046 | 0      | 0      | 0      | 0      | 0.9954 |   |
| 5 | septembe | 2  | Dog  | adult | Bold | Bold | 1 | 1 | 5.1 | 5m1m2  | 5.1.1 | 0 | 0   | 209 | 0  | 60  | 0   | 269 | 0      | 0.777  | 0      | 0      | 0      | 0.223  | 0 |
| 5 | septembe | 2  | Dog  | adult | Bold | Bold | 2 | 1 | 5.1 | 5m1m2  | 5.2.1 | 0 | 10  | 0   | 0  | 0   | 259 | 269 | 0.0372 | 0      | 0      | 0      | 0      | 0.9628 |   |
| 5 | septembe | 3  | Dog  | adult | Bold | Bold | 1 | 1 | 5.1 | 5m1m3  | 5.1.1 | 0 | 11  | 180 | 0  | 43  | 6   | 240 | 0.0458 | 0.75   | 0      | 0      | 0.1792 | 0.025  |   |
| 5 | septembe | 3  | Dog  | adult | Bold | Bold | 2 | 1 | 5.1 | 5m1m3  | 5.2.1 | 0 | 7   | 0   | 0  | 0   | 233 | 240 | 0.0292 | 0      | 0      | 0      | 0      | 0.9708 |   |
| 5 | septembe | 4  | Dog  | adult | Bold | Bold | 1 | 1 | 5.1 | 5m1m4  | 5.1.1 | 0 | 0   | 230 | 0  | 18  | 20  | 268 | 0      | 0.8582 | 0      | 0      | 0.0672 | 0.0746 |   |
| 5 | septembe | 4  | Dog  | adult | Bold | Bold | 2 | 1 | 5.1 | 5m1m4  | 5.2.1 | 0 | 23  | 0   | 0  | 0   | 245 | 268 | 0.0858 | 0      | 0      | 0      | 0      | 0.9142 |   |
| 5 | septembe | 5  | Dog  | adult | Bold | Bold | 1 | 1 | 5.1 | 5m1m5  | 5.1.1 | 0 | 7   | 183 | 3  | 25  | 27  | 245 | 0.0286 | 0.7469 | 0.0122 | 0.102  | 0      | 0.1102 |   |
| 5 | septembe | 5  | Dog  | adult | Bold | Bold | 2 | 1 | 5.1 | 5m1m5  | 5.2.1 | 0 | 13  | 0   | 0  | 0   | 232 | 245 | 0.0531 | 0      | 0      | 0      | 0      | 0.9469 |   |
| 5 | septembe | 1  | Dog  | adult | Shy  | Bold | 1 | 2 | 5.2 | 5m2m1  | 5.1.2 | 0 | 1   | 192 | 0  | 0   | 6   | 199 | 0.005  | 0.9648 | 0      | 0      | 0      | 0.0302 |   |
| 5 | septembe | 1  | Dog  | adult | Shy  | Bold | 2 | 2 | 5.2 | 5m2m1  | 5.2.2 | 0 | 0   | 52  | 0  | 8   | 2   | 62  | 0      | 0.8387 | 0      | 0      | 0.129  | 0.0323 |   |
| 5 | septembe | 2  | Dog  | adult | Shy  | Bold | 1 | 2 | 5.2 | 5m2m2  | 5.1.2 | 0 | 7   | 197 | 0  | 12  | 5   | 221 | 0.0317 | 0.8914 | 0      | 0      | 0.0543 | 0.0226 |   |
| 5 | septembe | 2  | Dog  | adult | Shy  | Bold | 2 | 2 | 5.2 | 5m2m2  | 5.2.2 | 0 | 13  | 184 | 0  | 8   | 16  | 221 | 0.0588 | 0.8326 | 0      | 0      | 0.0362 | 0.0724 |   |
| 5 | septembe | 3  | Dog  | adult | Shy  | Bold | 1 | 2 | 5.2 | 5m2m3  | 5.1.2 | 0 | 0   | 220 | 0  | 3   | 0   | 223 | 0      | 0.9865 | 0      | 0      | 0.0135 | 0      |   |
| 5 | septembe | 3  | Dog  | adult | Shy  | Bold | 2 | 2 | 5.2 | 5m2m3  | 5.2.2 | 0 | 0   | 194 | 0  | 4   | 25  | 223 | 0      | 0.87   | 0      | 0      | 0.0179 | 0.1121 |   |
| 5 | septembe | 4  | Dog  | adult | Shy  | Bold | 1 | 2 | 5.2 | 5m2m4  | 5.1.2 | 0 | 0   | 211 | 0  | 4   | 8   | 223 | 0      | 0.9462 | 0      | 0      | 0.0179 | 0.0359 |   |
| 5 | septembe | 4  | Dog  | adult | Shy  | Bold | 2 | 2 | 5.2 | 5m2m4  | 5.2.2 | 0 | 0   | 194 | 6  | 6   | 17  | 223 | 0      | 0.87   | 0.0269 | 0.0269 | 0.0762 |        |   |
| 5 | septembe | 5  | Dog  | adult | Shy  | Bold | 1 | 2 | 5.2 | 5m2m5  | 5.1.2 | 0 | 10  | 180 | 0  | 13  | 25  | 228 | 0.0439 | 0.7895 | 0      | 0      | 0.057  | 0.1096 |   |
| 5 | septembe | 5  | Dog  | adult | Shy  | Bold | 2 | 2 | 5.2 | 5m2m5  | 5.2.2 | 0 | 5   | 204 | 7  | 0   | 12  | 228 | 0.0219 | 0.8947 | 0.0307 | 0      | 0      | 0.0526 |   |
| 5 | septembe | 1  | Feed | adult | Bold | Bold | 1 | 3 | 5.3 | 5m3m1  | 5.1.3 | 0 | 48  | 107 | 6  | 11  | 9   | 181 | 0.2652 | 0.5912 | 0.0331 | 0.0608 | 0.0497 |        |   |
| 5 | septembe | 1  | Feed | adult | Bold | Bold | 2 | 3 | 5.3 | 5m3m1  | 5.2.3 | 0 | 27  | 94  | 0  | 2   | 13  | 136 | 0.1985 | 0.6912 | 0      | 0      | 0.0147 | 0.0956 |   |
| 5 | septembe | 2  | Feed | adult | Bold | Bold | 1 | 3 | 5.3 | 5m3m2  | 5.1.3 | 0 | 18  | 166 | 12 | 7   | 0   | 203 | 0.0887 | 0.8177 | 0.0591 | 0.0345 | 0      | 0      |   |
| 5 | septembe | 2  | Feed | adult | Bold | Bold | 2 | 3 | 5.3 | 5m3m2  | 5.2.3 | 0 | 20  | 80  | 13 | 4   | 82  | 199 | 0.1005 | 0.402  | 0.0653 | 0.0201 | 0.4121 | 0      |   |
| 5 | septembe | 3  | Feed | adult | Bold | Bold | 1 | 3 | 5.3 | 5m3m3  | 5.1.3 | 0 | 54  | 119 | 22 | 7   | 6   | 208 | 0.2596 | 0.5721 | 0.1058 | 0.0337 | 0.0288 | 0      |   |
| 5 | septembe | 3  | Feed | adult | Bold | Bold | 2 | 3 | 5.3 | 5m3m3  | 5.2.3 | 0 | 48  | 40  | 17 | 9   | 57  | 171 | 0.2807 | 0.2339 | 0.0994 | 0.0526 | 0.3333 | 0      |   |
| 5 | septembe | 4  | Feed | adult | Bold | Bold | 1 | 3 | 5.3 | 5m3m4  | 5.1.3 | 0 | 13  | 115 | 14 | 12  | 32  | 186 | 0.0699 | 0.6183 | 0.0753 | 0.0645 | 0.172  | 0      |   |
| 5 | septembe | 4  | Feed | adult | Bold | Bold | 2 | 3 | 5.3 | 5m3m4  | 5.2.3 | 0 | 46  | 29  | 14 | 0   | 102 | 191 | 0.2408 | 0.1518 | 0.0733 | 0      | 0.534  | 0      |   |
| 5 | septembe | 5  | Feed | adult | Bold | Bold | 1 | 3 | 5.3 | 5m3m5  | 5.1.3 | 0 | 36  | 83  | 32 | 6   | 27  | 184 | 0.1957 | 0.4511 | 0.1739 | 0.0326 | 0.1467 | 0      |   |
| 5 | septembe | 5  | Feed | adult | Bold | Bold | 2 | 3 | 5.3 | 5m3m5  | 5.2.3 | 0 | 38  | 102 | 27 | 9   | 36  | 212 | 0.1792 | 0.4811 | 0.1274 | 0.0425 | 0.1698 | 0      |   |
| 5 | septembe | 1  | Feed | adult | Shy  | Shy  | 1 | 4 | 5.4 | 5m4m1  | 5.1.4 | 0 | 17  | 161 | 0  | 6   | 0   | 184 | 0.0924 | 0.875  | 0      | 0      | 0.0326 | 0      |   |
| 5 | septembe | 1  | Feed | adult | Shy  | Shy  | 2 | 4 | 5.4 | 5m4m1  | 5.2.4 | 0 | 3   | 0   | 0  | 0   | 214 | 217 | 0.0138 | 0      | 0      | 0      | 0      | 0.9862 |   |
| 5 | septembe | 2  | Feed | adult | Shy  | Shy  | 1 | 4 | 5.4 | 5m4m2  | 5.1.4 | 0 | 10  | 158 | 0  | 7   | 0   | 175 | 0.0571 | 0.9029 | 0      | 0      | 0.04   | 0      |   |
| 5 | septembe | 2  | Feed | adult | Shy  | Shy  | 2 | 4 | 5.4 | 5m4m2  | 5.2.4 | 0 | 9   | 0   | 0  | 0   | 206 | 215 | 0.0419 | 0      | 0      | 0      | 0      | 0.9581 |   |
| 5 | septembe | 3  | Feed | adult | Shy  | Shy  | 1 | 4 | 5.4 | 5m4m3  | 5.1.4 | 0 | 12  | 146 | 10 | 28  | 0   | 196 | 0.0612 | 0.7449 | 0.051  | 0.1429 | 0      | 0      |   |
| 5 | septembe | 3  | Feed | adult | Shy  | Shy  | 2 | 4 | 5.4 | 5m4m3  | 5.2.4 | 0 | 11  | 0   | 0  | 0   | 211 | 222 | 0.0495 | 0      | 0      | 0      | 0      | 0.9505 |   |
| 5 | septembe | 4  | Feed | adult | Shy  | Shy  | 1 | 4 | 5.4 | 5m4m4  | 5.1.4 | 0 | 0   | 154 | 6  | 0   | 18  | 178 | 0      | 0.8652 | 0.0337 | 0      | 0      | 0.1011 |   |
| 5 | septembe | 4  | Feed | adult | Shy  | Shy  | 2 | 4 | 5.4 | 5m4m4  | 5.2.4 | 0 | 2   | 0   | 0  | 9   | 216 | 227 | 0.0088 | 0      | 0      | 0      | 0.0396 | 0.9515 |   |
| 5 | septembe | 5  | Feed | adult | Shy  | Shy  | 1 | 4 | 5.4 | 5m4m5  | 5.1.4 | 0 | 0   | 94  | 52 | 42  | 0   | 188 | 0      | 0.5    | 0.2766 | 0.2234 | 0      | 0      |   |
| 5 | septembe | 5  | Feed | adult | Shy  | Shy  | 2 | 4 | 5.4 | 5m4m5  | 5.2.4 | 0 | 6   | 0   | 0  | 0   | 221 | 227 | 0.0264 | 0      | 0      | 0      | 0      | 0.9736 |   |
| 5 | septembe | 11 | Feed | adult | Shy  | Shy  | 1 | 4 | 5.4 | 5m4m11 | 5.1.4 | 0 | 10  | 62  | 39 | 48  | 75  | 234 | 0.0427 | 0.265  | 0.1667 | 0.2051 | 0.3205 | 0      |   |
| 5 | septembe | 11 | Feed | adult | Shy  | Shy  | 2 | 4 | 5.4 | 5m4m11 | 5.2.4 | 0 | 40  | 19  | 0  | 9   | 166 | 234 | 0.1709 | 0.0812 | 0      | 0      | 0.0385 | 0.7094 |   |
| 5 | septembe | 12 | Feed | adult | Shy  | Shy  | 1 | 4 | 5.4 | 5m4m12 | 5.1.4 | 0 | 28  | 21  | 0  | 166 | 29  | 244 | 0.1148 | 0.0861 | 0      | 0      | 0.6803 | 0.1189 |   |
| 5 | septembe | 12 | Feed | adult | Shy  | Shy  | 2 | 4 | 5.4 | 5m4m12 | 5.2.4 | 0 | 34  | 0   | 0  | 4   | 206 | 244 | 0.1393 | 0      | 0      | 0      | 0.0164 | 0.8443 |   |
| 5 | septembe | 1  | Walk | adult | Shy  | Shy  | 1 | 5 | 5.5 | 5m5m1  | 5.1.5 | 0 | 49  | 80  | 0  | 45  | 40  | 214 | 0.229  | 0.3738 | 0      | 0      | 0.2103 | 0.1869 |   |
| 5 | septembe | 1  | Walk | adult | Shy  | Shy  | 2 | 5 | 5.5 | 5m5m1  | 5.2.5 | 0 | 30  | 0   | 0  | 7   | 177 | 214 | 0.1402 | 0      | 0      | 0      | 0.0327 | 0.8271 |   |
| 5 | septembe | 2  | Walk | adult | Shy  | Shy  | 1 | 5 | 5.5 | 5m5m2  | 5.1.5 | 0 | 102 | 30  | 0  | 62  | 32  | 226 | 0.4513 | 0.1327 | 0      | 0      | 0.2743 | 0.1416 |   |
| 5 | septembe | 2  | Walk | adult | Shy  | Shy  | 2 | 5 | 5.5 | 5m5m2  | 5.2.5 | 0 | 38  | 0   | 0  | 17  | 171 | 226 | 0.1681 | 0      | 0      | 0      | 0.0752 | 0.7566 |   |
| 5 | septembe | 3  | Walk | adult | Shy  | Shy  | 1 | 5 | 5.5 | 5m5m3  | 5.1.5 | 0 | 99  | 0   | 0  | 82  | 61  | 242 | 0.4091 | 0      | 0      | 0      | 0.3388 | 0.2521 |   |
| 5 | septembe | 3  | Walk | adult | Shy  | Shy  | 2 | 5 | 5.5 | 5m5m3  | 5.2.5 | 0 | 39  | 72  | 0  | 62  | 69  | 242 | 0.1612 | 0.2975 | 0      | 0      | 0.2562 | 0.2851 |   |
| 5 | septembe | 4  | Walk | adult | Shy  | Shy  | 1 | 5 | 5.5 | 5m5m4  | 5.1.5 | 0 | 21  | 0   | 0  | 6   | 57  | 84  | 0.25   | 0      | 0      | 0      | 0.0714 | 0.6786 |   |
| 5 | septembe | 4  | Walk | adult | Shy  | Shy  | 2 | 5 | 5.5 | 5m5m4  | 5.2.5 | 0 | 32  | 11  | 0  | 18  | 23  | 84  | 0.381  | 0.131  | 0      | 0      | 0.2143 | 0.2738 |   |
| 5 | septembe | 5  | Walk | adult | Shy  | Shy  | 1 | 5 | 5.5 | 5m5m5  | 5.1.5 | 0 | 14  | 66  | 0  | 62  | 100 | 242 | 0.0579 | 0.2727 | 0      | 0      | 0.2562 | 0.4132 |   |
| 5 | septembe | 5  | Walk | adult | Shy  | Shy  | 2 | 5 | 5.5 | 5m5m5  | 5.2.5 | 0 | 32  | 41  | 0  | 91  | 78  | 242 | 0.1322 | 0.1694 | 0      | 0      | 0.376  | 0.3223 |   |
| 5 | septembe | 8  | Walk | adult | Shy  | Shy  | 1 | 5 | 5.5 | 5m5m8  | 5.1.5 | 0 | 22  | 118 | 0  | 72  | 10  | 222 | 0.0991 | 0.5315 | 0      | 0      | 0.3243 | 0.045  |   |
| 5 | septembe | 8  | Walk | adult | Shy  | Shy  | 2 | 5 | 5.5 | 5m5m8  | 5.2.5 | 0 | 6   | 3   | 0  | 50  | 163 | 222 | 0.0207 | 0.0135 | 0      | 0      | 0.2252 | 0.7342 |   |
| 5 | septembe | 9  | Walk | adult | Shy  | Shy  | 1 | 5 | 5.5 | 5m5m9  | 5.1.5 | 0 | 20  | 36  | 0  | 65  | 138 | 259 | 0.0772 | 0.139  | 0      | 0      | 0.251  | 0.5328 |   |
| 5 | septembe | 9  | Walk | adult | Shy  | Shy  | 2 | 5 | 5.5 | 5m5m9  | 5.2.5 | 0 | 62  | 119 | 0  | 56  | 22  | 259 | 0.2394 | 0.4595 | 0      | 0      | 0.2162 | 0.0849 |   |
| 5 | septembe | 10 | Walk | adult | Shy  | Shy  | 1 | 5 | 5.5 | 5m5m10 | 5.1.5 | 0 | 32  | 65  | 0  | 51  | 93  | 241 | 0.1328 | 0.2697 | 0      | 0      | 0.2116 | 0.3859 |   |
| 5 | septembe | 10 | Walk | adult | Shy  | Shy  | 2 | 5 | 5.5 | 5m5m10 | 5.2.5 | 0 | 41  | 57  | 0  | 53  | 90  | 241 | 0.1701 | 0.2365 | 0      | 0      | 0.2199 | 0.3734 |   |
| 5 | septembe | 11 | Walk | adult | Shy  |      |   |   |     |        |       |   |     |     |    |     |     |     |        |        |        |        |        |        |   |

|   |          |    |                |       |         |      |   |   |     |        |       |   |     |     |     |     |     |     |        |        |        |        |        |       |
|---|----------|----|----------------|-------|---------|------|---|---|-----|--------|-------|---|-----|-----|-----|-----|-----|-----|--------|--------|--------|--------|--------|-------|
| 3 | July     | 11 | aChildaControl | child | boldshy | Bold | 1 | 7 | 3.7 | 3m7m11 | 3.1.7 | 1 | 30  | 155 | 27  | 58  | 20  | 290 | 0.1034 | 0.5345 | 0.0931 | 0.2    | 0.3655 | 0.069 |
| 3 | July     | 11 | aChildaControl | child | boldshy | Bold | 2 | 7 | 3.7 | 3m7m11 | 3.2.7 | 1 | 17  | 138 | 29  | 106 | 0   | 290 | 0.0586 | 0.4759 | 0.1    | 0.3655 | 0      | 0     |
| 3 | July     | 8  | ChildWalk      | child | Bold    | Bold | 1 | 8 | 3.8 | 3m8m8  | 3.1.8 | 1 | 2   | 260 | 9   | 46  | 0   | 317 | 0.0063 | 0.8202 | 0.0284 | 0.1451 | 0      | 0     |
| 3 | July     | 8  | ChildWalk      | child | Bold    | Bold | 2 | 8 | 3.8 | 3m8m8  | 3.2.8 | 1 | 95  | 173 | 0   | 43  | 6   | 317 | 0.2997 | 0.5457 | 0      | 0.1356 | 0.0189 | 0     |
| 3 | July     | 11 | ChildWalk      | child | Bold    | Bold | 1 | 8 | 3.8 | 3m8m11 | 3.1.8 | 1 | 52  | 38  | 172 | 26  | 0   | 288 | 0.1806 | 0.1319 | 0.5972 | 0.0903 | 0      | 0     |
| 3 | July     | 11 | ChildWalk      | child | Bold    | Bold | 2 | 8 | 3.8 | 3m8m11 | 3.2.8 | 1 | 4   | 0   | 163 | 44  | 77  | 288 | 0.0139 | 0      | 0.566  | 0.1528 | 0.2674 | 0     |
| 4 | August   | 12 | Dog            | adult | Bold    | Bold | 1 | 2 | 4.2 | 4m2m12 | 4.1.2 | 1 | 38  | 89  | 10  | 27  | 56  | 220 | 0.1727 | 0.4045 | 0.0455 | 0.1227 | 0.2545 | 0     |
| 4 | August   | 12 | Dog            | adult | Bold    | Bold | 2 | 2 | 4.2 | 4m2m12 | 4.2.2 | 1 | 23  | 16  | 0   | 16  | 165 | 220 | 0.1045 | 0.0727 | 0      | 0.0727 | 0.75   | 0     |
| 5 | septembe | 10 | Feed           | adult | Bold    | Bold | 1 | 3 | 5.3 | 5m3m10 | 5.1.3 | 1 | 19  | 144 | 17  | 30  | 16  | 226 | 0.0841 | 0.6372 | 0.0752 | 0.1327 | 0.0708 | 0     |
| 5 | septembe | 10 | Feed           | adult | Bold    | Bold | 2 | 3 | 5.3 | 5m3m10 | 5.2.3 | 1 | 8   | 86  | 5   | 17  | 110 | 226 | 0.0354 | 0.3805 | 0.0221 | 0.0752 | 0.4867 | 0     |
| 5 | septembe | 12 | Feed           | adult | Bold    | Bold | 1 | 3 | 5.3 | 5m3m12 | 5.1.3 | 1 | 18  | 83  | 5   | 8   | 119 | 233 | 0.0773 | 0.3562 | 0.0215 | 0.0343 | 0.5107 | 0     |
| 5 | septembe | 12 | Feed           | adult | Bold    | Bold | 2 | 3 | 5.3 | 5m3m12 | 5.2.3 | 1 | 12  | 183 | 13  | 22  | 3   | 233 | 0.0515 | 0.7854 | 0.0558 | 0.0944 | 0.0129 | 0     |
| 5 | septembe | 9  | Feed           | adult | Shy     | Shy  | 1 | 4 | 5.4 | 5m4m9  | 5.1.4 | 1 | 15  | 8   | 8   | 194 | 0   | 225 | 0.0667 | 0.0356 | 0.0356 | 0.8622 | 0      |       |
| 5 | septembe | 9  | Feed           | adult | Shy     | Shy  | 2 | 4 | 5.4 | 5m4m9  | 5.2.4 | 1 | 21  | 18  | 0   | 29  | 157 | 225 | 0.0933 | 0.08   | 0      | 0.1289 | 0.6978 | 0     |
| 5 | septembe | 10 | Feed           | adult | Shy     | Shy  | 1 | 4 | 5.4 | 5m4m10 | 5.1.4 | 1 | 3   | 48  | 8   | 136 | 47  | 242 | 0.0124 | 0.1983 | 0.0331 | 0.562  | 0.1942 | 0     |
| 5 | septembe | 10 | Feed           | adult | Shy     | Shy  | 2 | 4 | 5.4 | 5m4m10 | 5.2.4 | 1 | 29  | 17  | 0   | 0   | 196 | 242 | 0.1198 | 0.0702 | 0      | 0      | 0.8099 | 0     |
| 5 | septembe | 10 | aControl       | adult | Shy     | Shy  | 1 | 8 | 5.8 | 5m8m10 | 5.1.8 | 1 | 3   | 23  | 0   | 46  | 159 | 231 | 0.013  | 0.0996 | 0      | 0.1991 | 0.6883 | 0     |
| 5 | septembe | 10 | aControl       | adult | Shy     | Shy  | 2 | 8 | 5.8 | 5m8m10 | 5.2.8 | 1 | 0   | 79  | 0   | 43  | 109 | 231 | 0      | 0.342  | 0      | 0.1861 | 0.4719 | 0     |
| 1 | April    | 8  | Dog            | adult | Bold    | Bold | 1 | 1 | 1.1 | 1m1m8  | 1.1.1 | 2 | 18  | 137 | 2   | 68  | 12  | 237 | 0.0759 | 0.5781 | 0.0084 | 0.2869 | 0.0506 | 0     |
| 1 | April    | 11 | Dog            | adult | Bold    | Bold | 1 | 1 | 1.1 | 1m1m11 | 1.1.1 | 2 | 5   | 130 | 7   | 56  | 34  | 232 | 0.0216 | 0.5603 | 0.0302 | 0.2414 | 0.1466 | 0     |
| 1 | April    | 11 | Dog            | adult | Bold    | Bold | 2 | 1 | 1.1 | 1m1m11 | 1.2.1 | 2 | 8   | 139 | 0   | 57  | 28  | 232 | 0.0345 | 0.5991 | 0      | 0.2457 | 0.1207 | 0     |
| 1 | April    | 12 | Dog            | adult | Bold    | Bold | 2 | 1 | 1.1 | 1m1m12 | 1.2.1 | 2 | 128 | 43  | 25  | 66  | 26  | 288 | 0.4444 | 0.1493 | 0.0868 | 0.2292 | 0.0903 | 0     |
| 1 | April    | 9  | Dog            | adult | Shy     | Shy  | 2 | 2 | 1.2 | 1m2m9  | 1.2.2 | 2 | 34  | 96  | 0   | 25  | 62  | 217 | 0.1567 | 0.4424 | 0      | 0.1152 | 0.2857 | 0     |
| 1 | April    | 11 | Dog            | adult | Shy     | Shy  | 2 | 2 | 1.2 | 1m2m11 | 1.2.2 | 2 | 16  | 123 | 0   | 34  | 51  | 224 | 0.0714 | 0.5491 | 0      | 0.1518 | 0.2277 | 0     |
| 1 | April    | 9  | Feed           | adult | Bold    | Bold | 2 | 4 | 1.4 | 1m4m9  | 1.2.4 | 2 | 61  | 8   | 2   | 11  | 171 | 253 | 0.2411 | 0.0316 | 0.0079 | 0.0435 | 0.6759 | 0     |
| 1 | April    | 11 | Feed           | adult | Bold    | Bold | 2 | 4 | 1.4 | 1m4m11 | 1.2.4 | 2 | 34  | 49  | 0   | 13  | 145 | 241 | 0.1411 | 0.2033 | 0      | 0.0539 | 0.6017 | 0     |
| 1 | April    | 10 | Walk           | adult | Bold    | Bold | 1 | 7 | 1.7 | 1m7m10 | 1.1.7 | 2 | 19  | 86  | 0   | 26  | 110 | 241 | 0.0788 | 0.3568 | 0      | 0.1079 | 0.4564 | 0     |
| 1 | April    | 11 | Walk           | adult | Bold    | Bold | 2 | 7 | 1.7 | 1m7m11 | 1.2.7 | 2 | 31  | 66  | 0   | 33  | 110 | 240 | 0.1292 | 0.275  | 0      | 0.1375 | 0.4583 | 0     |
| 2 | June     | 12 | ChildWalk      | child | Bold    | Bold | 1 | 5 | 2.5 | 2m5m12 | 2.1.5 | 2 | 37  | 0   | 0   | 229 | 0   | 266 | 0.1391 | 0      | 0      | 0.8609 | 0      | 0     |
| 2 | June     | 12 | ChildWalk      | child | Bold    | Bold | 2 | 5 | 2.5 | 2m5m12 | 2.2.5 | 2 | 0   | 0   | 0   | 266 | 0   | 266 | 0      | 0      | 0      | 1      | 0      | 0     |
| 3 | July     | 9  | ChildFeed      | child | Bold    | Bold | 1 | 3 | 3.3 | 3m3m9  | 3.1.3 | 2 | 8   | 75  | 8   | 209 | 0   | 300 | 0.0267 | 0.25   | 0.0267 | 0.6967 | 0      | 0     |
| 3 | July     | 9  | ChildFeed      | child | Bold    | Bold | 2 | 3 | 3.3 | 3m3m9  | 3.2.3 | 2 | 68  | 26  | 16  | 145 | 45  | 300 | 0.2267 | 0.0867 | 0.0533 | 0.4833 | 0.15   | 0     |
| 3 | July     | 11 | ChildFeed      | child | Bold    | Bold | 1 | 3 | 3.3 | 3m3m11 | 3.1.3 | 2 | 106 | 47  | 71  | 103 | 0   | 327 | 0.3242 | 0.1437 | 0.2171 | 0.315  | 0      | 0     |
| 3 | July     | 11 | ChildFeed      | child | Bold    | Bold | 2 | 3 | 3.3 | 3m3m11 | 3.2.3 | 2 | 106 | 0   | 31  | 117 | 73  | 327 | 0.3242 | 0      | 0.0948 | 0.3578 | 0.2232 | 0     |
| 3 | July     | 9  | ChildWalk      | child | Bold    | Bold | 1 | 4 | 3.4 | 3m4m9  | 3.1.4 | 2 | 30  | 91  | 12  | 167 | 0   | 300 | 0.1    | 0.3033 | 0.04   | 0.5567 | 0      | 0     |
| 3 | July     | 9  | ChildWalk      | child | Bold    | Bold | 2 | 4 | 3.4 | 3m4m9  | 3.2.4 | 2 | 39  | 21  | 7   | 229 | 4   | 300 | 0.13   | 0.07   | 0.0233 | 0.7633 | 0.0133 | 0     |
| 3 | July     | 8  | ChildWalk      | child | boldshy | Bold | 1 | 5 | 3.5 | 3m5m8  | 3.1.5 | 2 | 0   | 99  | 21  | 38  | 77  | 235 | 0      | 0.4213 | 0.0894 | 0.1617 | 0.3277 | 0     |
| 3 | July     | 8  | ChildWalk      | child | boldshy | Bold | 2 | 5 | 3.5 | 3m5m8  | 3.2.5 | 2 | 24  | 103 | 0   | 44  | 64  | 235 | 0.1021 | 0.4383 | 0      | 0.1872 | 0.2723 | 0     |
| 5 | septembe | 11 | Dog            | adult | Shy     | Bold | 1 | 2 | 5.2 | 5m2m11 | 5.1.2 | 2 | 0   | 213 | 0   | 6   | 0   | 219 | 0      | 0.9726 | 0      | 0.0274 | 0      | 0     |
| 5 | septembe | 11 | Dog            | adult | Shy     | Bold | 2 | 2 | 5.2 | 5m2m11 | 5.2.2 | 2 | 0   | 80  | 0   | 16  | 123 | 219 | 0      | 0.3653 | 0      | 0.0731 | 0.5616 | 0     |
| 5 | septembe | 11 | Feed           | adult | Bold    | Bold | 1 | 3 | 5.3 | 5m3m11 | 5.1.3 | 2 | 13  | 87  | 32  | 18  | 75  | 225 | 0.0578 | 0.3867 | 0.1422 | 0.08   | 0.3333 | 0     |
| 5 | septembe | 11 | Feed           | adult | Bold    | Bold | 2 | 3 | 5.3 | 5m3m11 | 5.2.3 | 2 | 10  | 125 | 40  | 23  | 27  | 225 | 0.0444 | 0.5556 | 0.1778 | 0.1022 | 0.12   | 0     |
| 1 | April    | 10 | Dog            | adult | Bold    | Bold | 1 | 1 | 1.1 | 1m1m10 | 1.1.1 | 3 | 18  | 115 | 7   | 58  | 44  | 242 | 0.0744 | 0.4752 | 0.0289 | 0.2397 | 0.1818 | 0     |
| 1 | April    | 12 | Dog            | adult | Shy     | Shy  | 1 | 2 | 1.2 | 1m2m12 | 1.1.2 | 3 | 31  | 8   | 0   | 14  | 164 | 217 | 0.1429 | 0.0369 | 0      | 0.0645 | 0.7558 | 0     |
| 1 | April    | 12 | Dog            | adult | Shy     | Shy  | 2 | 2 | 1.2 | 1m2m12 | 1.2.2 | 3 | 31  | 25  | 0   | 20  | 141 | 217 | 0.1429 | 0.1152 | 0      | 0.0922 | 0.6498 | 0     |
| 1 | April    | 12 | aControl       | adult | Shy     | Shy  | 2 | 8 | 1.8 | 1m8m12 | 1.2.8 | 3 | 9   | 59  | 0   | 43  | 117 | 228 | 0.0395 | 0.2588 | 0      | 0.1886 | 0.5132 | 0     |
| 2 | June     | 12 | ChildWalk      | child | Bold    | Bold | 1 | 6 | 2.6 | 2m6m12 | 2.1.6 | 3 | 0   | 214 | 0   | 8   | 0   | 222 | 0      | 0.964  | 0      | 0.036  | 0      | 0     |
| 2 | June     | 12 | ChildWalk      | child | Bold    | Bold | 2 | 6 | 2.6 | 2m6m12 | 2.2.6 | 3 | 33  | 7   | 0   | 126 | 56  | 222 | 0.1486 | 0.0315 | 0      | 0.5676 | 0.2523 | 0     |
| 3 | July     | 10 | ChildFeed      | child | Bold    | Bold | 1 | 3 | 3.3 | 3m3m10 | 3.1.3 | 3 | 102 | 84  | 48  | 64  | 4   | 302 | 0.3377 | 0.2781 | 0.1589 | 0.2119 | 0.0132 | 0     |
| 3 | July     | 10 | ChildFeed      | child | Bold    | Bold | 2 | 3 | 3.3 | 3m3m10 | 3.2.3 | 3 | 60  | 13  | 3   | 38  | 188 | 302 | 0.1987 | 0.043  | 0.0099 | 0.1258 | 0.6225 | 0     |
| 3 | July     | 10 | ChildWalk      | child | Bold    | Bold | 1 | 4 | 3.4 | 3m4m10 | 3.1.4 | 3 | 76  | 109 | 33  | 96  | 17  | 331 | 0.2296 | 0.3293 | 0.0997 | 0.29   | 0.0514 | 0     |
| 3 | July     | 10 | ChildWalk      | child | Bold    | Bold | 2 | 4 | 3.4 | 3m4m10 | 3.2.4 | 3 | 33  | 52  | 16  | 56  | 174 | 331 | 0.0997 | 0.1571 | 0.0483 | 0.1692 | 0.5257 | 0     |
| 4 | August   | 10 | Dog            | adult | Bold    | Bold | 1 | 1 | 4.1 | 4m1m10 | 4.1.1 | 3 | 9   | 77  | 13  | 11  | 92  | 202 | 0.0446 | 0.3812 | 0.0644 | 0.0545 | 0.4554 | 0     |
| 5 | septembe | 9  | Feed           | adult | Bold    | Bold | 1 | 3 | 5.3 | 5m3m9  | 5.1.3 | 3 | 57  | 79  | 15  | 46  | 24  | 221 | 0.2579 | 0.3575 | 0.0679 | 0.2081 | 0.1086 | 0     |
| 5 | septembe | 9  | Feed           | adult | Bold    | Bold | 2 | 3 | 5.3 | 5m3m9  | 5.2.3 | 3 | 42  | 89  | 32  | 26  | 32  | 221 | 0.19   | 0.4027 | 0.1448 | 0.1176 | 0.1448 | 0     |
| 1 | April    | 9  | Dog            | adult | Bold    | Bold | 1 | 1 | 1.1 | 1m1m9  | 1.1.1 | 4 | 25  | 127 | 6   | 50  | 28  | 236 | 0.1059 | 0.5381 | 0.0254 | 0.2119 | 0.1186 | 0     |
| 1 | April    | 9  | Dog            | adult | Bold    | Bold | 2 | 1 | 1.1 | 1m1m9  | 1.2.1 | 4 | 14  | 110 | 26  | 49  | 37  | 236 | 0.0593 | 0.4661 | 0.1102 | 0.2076 | 0.1568 | 0     |
| 1 | April    | 11 | aControl       | adult | Shy     | Shy  | 1 | 8 | 1.8 | 1m8m11 | 1.1.8 | 4 | 5   | 56  | 0   | 8   | 168 | 237 | 0.0211 | 0.2363 | 0      | 0.0338 | 0.7089 | 0     |
| 2 | June     | 8  | ChildFeed      | child | Bold    | Bold | 1 | 2 | 2.2 | 2m2m8  | 2.1.2 | 4 | 61  | 22  | 0   | 72  | 66  | 221 | 0.276  | 0.0995 | 0      | 0.3258 | 0.2986 | 0     |
| 2 | June     | 8  | ChildFeed      | child | Bold    | Bold | 2 | 2 | 2.2 | 2m2m8  | 2.2.2 | 4 | 142 | 51  | 8   | 20  | 0   | 221 | 0.6425 | 0.2308 | 0.0362 | 0.0905 | 0      | 0     |
| 3 | July     | 10 | aChildaControl | child | boldshy | Bold | 1 | 7 | 3.7 | 3m7m10 | 3.1.7 | 4 | 26  | 155 | 11  | 117 | 8   | 317 | 0.082  | 0.489  | 0.0347 | 0.3691 | 0.0252 | 0     |
| 3 | July     | 10 | aChildaControl | child | boldshy | Bold | 2 | 7 | 3.7 | 3m7m10 | 3.2.7 | 4 | 21  | 171 | 33  | 92  | 0   | 317 | 0.0662 | 0.5394 | 0.1041 | 0.2902 | 0      | 0     |
| 3 | July     | 9  | ChildWalk      | child | Bold    | Bold | 1 | 8 | 3.8 | 3m8m9  | 3.1.8 | 4 | 52  | 194 | 14  | 76  | 0   | 336 | 0.1548 | 0.5774 | 0.0417 | 0.2262 | 0      | 0     |
| 3 | July     | 9  | ChildWalk      | child | Bold    | Bold | 2 | 8 | 3.8 | 3m8m9  | 3.2.8 |   |     |     |     |     |     |     |        |        |        |        |        |       |



|   |          |    |                |       |         |      |   |   |     |        |       |    |     |     |    |     |     |     |        |        |        |        |        |   |
|---|----------|----|----------------|-------|---------|------|---|---|-----|--------|-------|----|-----|-----|----|-----|-----|-----|--------|--------|--------|--------|--------|---|
| 2 | June     | 8  | ChildFeed      | child | Bold    | Bold | 1 | 1 | 2.1 | 2m1m8  | 2.1.1 | 8  | 150 | 53  | 3  | 16  | 0   | 222 | 0.6757 | 0.2387 | 0.0135 | 0.0721 | 0      | 0 |
| 2 | June     | 8  | ChildFeed      | child | Bold    | Bold | 2 | 1 | 2.1 | 2m1m8  | 2.2.1 | 8  | 181 | 34  | 7  | 0   | 0   | 222 | 0.8153 | 0.1532 | 0.0315 | 0      | 0      | 0 |
| 2 | June     | 12 | aChildaControl | child | Bold    | Bold | 1 | 8 | 2.8 | 2m8m12 | 2.1.8 | 8  | 82  | 61  | 0  | 104 | 10  | 257 | 0.3191 | 0.2374 | 0      | 0.4047 | 0.0389 | 0 |
| 2 | June     | 12 | aChildaControl | child | Bold    | Bold | 2 | 8 | 2.8 | 2m8m12 | 2.2.8 | 8  | 56  | 35  | 0  | 78  | 88  | 257 | 0.2179 | 0.1362 | 0      | 0.3035 | 0.3424 | 0 |
| 3 | July     | 8  | ChildFeed      | child | Bold    | Bold | 1 | 3 | 3.3 | 3m3m8  | 3.1.3 | 8  | 94  | 74  | 25 | 59  | 19  | 271 | 0.3469 | 0.2731 | 0.0923 | 0.2177 | 0.0701 | 0 |
| 3 | July     | 8  | ChildFeed      | child | Bold    | Bold | 2 | 3 | 3.3 | 3m3m8  | 3.2.3 | 8  | 62  | 64  | 0  | 73  | 72  | 271 | 0.2288 | 0.2362 | 0      | 0.2694 | 0.2657 | 0 |
| 4 | August   | 12 | Feed           | adult | Bold    | Bold | 1 | 3 | 4.3 | 4m3m12 | 4.1.3 | 8  | 40  | 55  | 27 | 84  | 16  | 222 | 0.1802 | 0.2477 | 0.1216 | 0.3784 | 0.0721 | 0 |
| 4 | August   | 12 | Feed           | adult | Bold    | Bold | 2 | 3 | 4.3 | 4m3m12 | 4.2.3 | 8  | 19  | 29  | 23 | 117 | 34  | 222 | 0.0856 | 0.1306 | 0.1036 | 0.527  | 0.1532 | 0 |
| 1 | April    | 10 | aControl       | adult | Shy     | Shy  | 1 | 8 | 1.8 | 1m8m10 | 1.1.8 | 9  | 5   | 126 | 9  | 25  | 74  | 239 | 0.0209 | 0.5272 | 0.0377 | 0.1046 | 0.3096 | 0 |
| 3 | July     | 8  | ChildFeed      | child | Bold    | Bold | 1 | 1 | 3.1 | 3m1m8  | 3.1.1 | 9  | 66  | 92  | 12 | 64  | 49  | 283 | 0.2332 | 0.3251 | 0.0424 | 0.2261 | 0.1731 | 0 |
| 3 | July     | 8  | ChildFeed      | child | Bold    | Bold | 2 | 1 | 3.1 | 3m1m8  | 3.2.1 | 9  | 76  | 135 | 10 | 62  | 0   | 283 | 0.2686 | 0.477  | 0.0353 | 0.2191 | 0      | 0 |
| 5 | septembe | 10 | Dog            | adult | Shy     | Bold | 1 | 2 | 5.2 | 5m2m10 | 5.1.2 | 9  | 2   | 106 | 0  | 4   | 125 | 237 | 0.0084 | 0.4473 | 0      | 0.0169 | 0.5274 | 0 |
| 5 | septembe | 10 | Dog            | adult | Shy     | Bold | 2 | 2 | 5.2 | 5m2m10 | 5.2.2 | 9  | 0   | 216 | 0  | 7   | 14  | 237 | 0      | 0.9114 | 0      | 0.0295 | 0.0591 | 0 |
| 1 | April    | 10 | Feed           | adult | Bold    | Bold | 1 | 4 | 1.4 | 1m4m10 | 1.1.4 | 11 | 28  | 77  | 8  | 64  | 69  | 246 | 0.1138 | 0.313  | 0.0325 | 0.2602 | 0.2805 | 0 |
| 2 | June     | 9  | ChildWalk      | child | Bold    | Bold | 1 | 5 | 2.5 | 2m5m9  | 2.1.5 | 12 | 40  | 151 | 0  | 38  | 76  | 305 | 0.1311 | 0.4951 | 0      | 0.1246 | 0.2492 | 0 |
| 2 | June     | 9  | ChildWalk      | child | Bold    | Bold | 2 | 5 | 2.5 | 2m5m9  | 2.2.5 | 12 | 0   | 160 | 0  | 92  | 53  | 305 | 0      | 0.5246 | 0      | 0.3016 | 0.1738 | 0 |
| 3 | July     | 9  | aChildaControl | child | boldshy | Bold | 1 | 7 | 3.7 | 3m7m9  | 3.1.7 | 12 | 35  | 7   | 21 | 47  | 157 | 267 | 0.1311 | 0.0262 | 0.0787 | 0.176  | 0.588  | 0 |
| 3 | July     | 9  | aChildaControl | child | boldshy | Bold | 2 | 7 | 3.7 | 3m7m9  | 3.2.7 | 12 | 18  | 130 | 10 | 109 | 0   | 267 | 0.0674 | 0.4869 | 0.0375 | 0.4082 | 0      | 0 |
| 3 | July     | 11 | ChildWalk      | child | Bold    | Bold | 1 | 4 | 3.4 | 3m4m11 | 3.1.4 | 14 | 43  | 202 | 6  | 49  | 31  | 331 | 0.1299 | 0.6103 | 0.0181 | 0.148  | 0.0937 | 0 |
| 3 | July     | 11 | ChildWalk      | child | Bold    | Bold | 2 | 4 | 3.4 | 3m4m11 | 3.2.4 | 14 | 41  | 73  | 50 | 113 | 54  | 331 | 0.1239 | 0.2205 | 0.1511 | 0.3414 | 0.1631 | 0 |
| 4 | August   | 9  | Feed           | adult | Bold    | Bold | 1 | 3 | 4.3 | 4m3m9  | 4.1.3 | 14 | 72  | 58  | 6  | 39  | 34  | 209 | 0.3445 | 0.2775 | 0.0287 | 0.1866 | 0.1627 | 0 |
| 4 | August   | 9  | Feed           | adult | Bold    | Bold | 2 | 3 | 4.3 | 4m3m9  | 4.2.3 | 14 | 58  | 76  | 0  | 75  | 0   | 209 | 0.2775 | 0.3636 | 0      | 0.3589 | 0      | 0 |
| 2 | June     | 10 | ChildWalk      | child | Bold    | Bold | 1 | 5 | 2.5 | 2m5m10 | 2.1.5 | 15 | 2   | 212 | 0  | 31  | 19  | 264 | 0.0076 | 0.803  | 0      | 0.1174 | 0.072  | 0 |
| 2 | June     | 10 | ChildWalk      | child | Bold    | Bold | 2 | 5 | 2.5 | 2m5m10 | 2.2.5 | 15 | 64  | 148 | 0  | 32  | 20  | 264 | 0.2424 | 0.5606 | 0      | 0.1212 | 0.0758 | 0 |
| 2 | June     | 11 | aChildaControl | child | Bold    | Bold | 1 | 8 | 2.8 | 2m8m11 | 2.1.8 | 15 | 42  | 150 | 0  | 44  | 32  | 268 | 0.1567 | 0.5597 | 0      | 0.1642 | 0.1194 | 0 |
| 2 | June     | 11 | aChildaControl | child | Bold    | Bold | 2 | 8 | 2.8 | 2m8m11 | 2.2.8 | 15 | 23  | 45  | 0  | 64  | 136 | 268 | 0.0858 | 0.1679 | 0      | 0.2388 | 0.5075 | 0 |
| 3 | July     | 8  | aChildaControl | child | boldshy | Bold | 1 | 7 | 3.7 | 3m7m8  | 3.1.7 | 15 | 73  | 77  | 13 | 108 | 27  | 298 | 0.245  | 0.2584 | 0.0436 | 0.3624 | 0.0906 | 0 |
| 3 | July     | 8  | aChildaControl | child | boldshy | Bold | 2 | 7 | 3.7 | 3m7m8  | 3.2.7 | 15 | 85  | 78  | 0  | 75  | 60  | 298 | 0.2852 | 0.2617 | 0      | 0.2517 | 0.2013 | 0 |
| 5 | septembe | 8  | Feed           | adult | Bold    | Bold | 1 | 3 | 5.3 | 5m3m8  | 5.1.3 | 15 | 48  | 129 | 20 | 14  | 0   | 211 | 0.2275 | 0.6114 | 0.0948 | 0.0664 | 0      | 0 |
| 5 | septembe | 8  | Feed           | adult | Bold    | Bold | 2 | 3 | 5.3 | 5m3m8  | 5.2.3 | 15 | 76  | 92  | 18 | 22  | 3   | 211 | 0.3602 | 0.436  | 0.0853 | 0.1043 | 0.0142 | 0 |
| 1 | April    | 8  | aControl       | adult | Shy     | Shy  | 1 | 8 | 1.8 | 1m8m8  | 1.1.8 | 17 | 11  | 212 | 0  | 20  | 0   | 243 | 0.0453 | 0.8724 | 0      | 0.0823 | 0      | 0 |
| 2 | June     | 9  | ChildWalk      | child | Bold    | Bold | 1 | 6 | 2.6 | 2m6m9  | 2.1.6 | 17 | 0   | 245 | 0  | 0   | 0   | 245 | 0      | 1      | 0      | 0      | 0      | 0 |
| 2 | June     | 9  | ChildWalk      | child | Bold    | Bold | 2 | 6 | 2.6 | 2m6m9  | 2.2.6 | 17 | 9   | 0   | 0  | 0   | 236 | 245 | 0.0367 | 0      | 0      | 0      | 0.9633 | 0 |
| 4 | August   | 8  | Dog            | adult | Bold    | Bold | 1 | 1 | 4.1 | 4m1m8  | 4.1.1 | 17 | 36  | 114 | 7  | 45  | 29  | 231 | 0.1558 | 0.4935 | 0.0303 | 0.1948 | 0.1255 | 0 |
| 2 | June     | 9  | aChildaControl | child | Bold    | Bold | 1 | 8 | 2.8 | 2m8m9  | 2.1.8 | 18 | 0   | 145 | 0  | 4   | 89  | 238 | 0      | 0.6092 | 0      | 0.0168 | 0.3739 | 0 |
| 2 | June     | 9  | aChildaControl | child | Bold    | Bold | 2 | 8 | 2.8 | 2m8m9  | 2.2.8 | 18 | 0   | 80  | 0  | 29  | 129 | 238 | 0      | 0.3361 | 0      | 0.1218 | 0.542  | 0 |
| 5 | septembe | 12 | Dog            | adult | Bold    | Bold | 1 | 1 | 5.1 | 5m1m12 | 5.1.1 | 19 | 0   | 158 | 0  | 98  | 0   | 256 | 0      | 0.6172 | 0      | 0.3828 | 0      | 0 |
| 5 | septembe | 12 | Dog            | adult | Bold    | Bold | 2 | 1 | 5.1 | 5m1m12 | 5.2.1 | 19 | 3   | 0   | 0  | 0   | 253 | 256 | 0.0117 | 0      | 0      | 0      | 0.9883 | 0 |
| 1 | April    | 9  | aControl       | adult | Shy     | Shy  | 1 | 8 | 1.8 | 1m8m9  | 1.1.8 | 20 | 31  | 131 | 0  | 42  | 41  | 245 | 0.1265 | 0.5347 | 0      | 0.1714 | 0.1673 | 0 |
| 4 | August   | 11 | aControl       | adult | Bold    | Bold | 1 | 8 | 4.8 | 4m8m11 | 4.1.8 | 20 | 6   | 95  | 6  | 15  | 95  | 217 | 0.0276 | 0.4378 | 0.0276 | 0.0691 | 0.4378 | 0 |
| 4 | August   | 11 | aControl       | adult | Bold    | Bold | 2 | 8 | 4.8 | 4m8m11 | 4.2.8 | 20 | 0   | 135 | 4  | 3   | 75  | 217 | 0      | 0.6221 | 0.0184 | 0.0138 | 0.3456 | 0 |
| 5 | septembe | 11 | Dog            | adult | Bold    | Bold | 1 | 1 | 5.1 | 5m1m11 | 5.1.1 | 21 | 0   | 188 | 3  | 56  | 0   | 247 | 0      | 0.7611 | 0.0121 | 0.2267 | 0      | 0 |
| 5 | septembe | 11 | Dog            | adult | Bold    | Bold | 2 | 1 | 5.1 | 5m1m11 | 5.2.1 | 21 | 1   | 0   | 0  | 0   | 246 | 247 | 0.004  | 0      | 0      | 0      | 0.996  | 0 |
| 2 | June     | 8  | ChildWalk      | child | Bold    | Bold | 1 | 5 | 2.5 | 2m5m8  | 2.1.5 | 22 | 4   | 126 | 15 | 72  | 10  | 227 | 0.0176 | 0.5551 | 0.0661 | 0.3172 | 0.0441 | 0 |
| 2 | June     | 8  | ChildWalk      | child | Bold    | Bold | 2 | 5 | 2.5 | 2m5m8  | 2.2.5 | 22 | 0   | 122 | 9  | 46  | 50  | 227 | 0      | 0.5374 | 0.0396 | 0.2026 | 0.2203 | 0 |
| 2 | June     | 8  | ChildWalk      | child | Bold    | Bold | 1 | 6 | 2.6 | 2m6m8  | 2.1.6 | 23 | 0   | 243 | 0  | 5   | 0   | 248 | 0      | 0.9798 | 0      | 0.0202 | 0      | 0 |
| 2 | June     | 8  | ChildWalk      | child | Bold    | Bold | 2 | 6 | 2.6 | 2m6m8  | 2.2.6 | 23 | 19  | 0   | 0  | 0   | 229 | 248 | 0.0766 | 0      | 0      | 0      | 0.9234 | 0 |
| 2 | June     | 10 | ChildWalk      | child | Bold    | Bold | 1 | 6 | 2.6 | 2m6m10 | 2.1.6 | 25 | 6   | 227 | 0  | 14  | 0   | 247 | 0.0243 | 0.919  | 0      | 0.0567 | 0      | 0 |
| 2 | June     | 10 | ChildWalk      | child | Bold    | Bold | 2 | 6 | 2.6 | 2m6m10 | 2.2.6 | 25 | 10  | 0   | 0  | 21  | 216 | 247 | 0.0405 | 0      | 0      | 0.085  | 0.8745 | 0 |
| 4 | August   | 10 | aControl       | adult | Bold    | Bold | 1 | 8 | 4.8 | 4m8m10 | 4.1.8 | 25 | 2   | 109 | 0  | 16  | 94  | 221 | 0.009  | 0.4932 | 0      | 0.0724 | 0.4253 | 0 |
| 4 | August   | 10 | aControl       | adult | Bold    | Bold | 2 | 8 | 4.8 | 4m8m10 | 4.2.8 | 25 | 5   | 125 | 0  | 26  | 65  | 221 | 0.0226 | 0.5656 | 0      | 0.1176 | 0.2941 | 0 |
| 5 | septembe | 10 | Dog            | adult | Bold    | Bold | 1 | 1 | 5.1 | 5m1m10 | 5.1.1 | 26 | 9   | 155 | 0  | 76  | 3   | 243 | 0.037  | 0.6379 | 0      | 0.3128 | 0.0123 | 0 |
| 5 | septembe | 10 | Dog            | adult | Bold    | Bold | 2 | 1 | 5.1 | 5m1m10 | 5.2.1 | 26 | 1   | 0   | 0  | 0   | 242 | 243 | 0.0041 | 0      | 0      | 0      | 0.9959 | 0 |
| 5 | septembe | 9  | Dog            | adult | Shy     | Bold | 1 | 2 | 5.2 | 5m2m9  | 5.1.2 | 31 | 2   | 192 | 0  | 33  | 42  | 269 | 0.0074 | 0.7138 | 0      | 0.1227 | 0.1561 | 0 |
| 5 | septembe | 9  | Dog            | adult | Shy     | Bold | 2 | 2 | 5.2 | 5m2m9  | 5.2.2 | 31 | 8   | 238 | 0  | 23  | 0   | 269 | 0.0297 | 0.8848 | 0      | 0.0855 | 0      | 0 |
| 4 | August   | 9  | aControl       | adult | Bold    | Bold | 1 | 8 | 4.8 | 4m8m9  | 4.1.8 | 33 | 42  | 131 | 0  | 31  | 18  | 222 | 0.1892 | 0.5901 | 0      | 0.1396 | 0.0811 | 0 |
| 4 | August   | 9  | aControl       | adult | Bold    | Bold | 2 | 8 | 4.8 | 4m8m9  | 4.2.8 | 33 | 22  | 112 | 5  | 34  | 49  | 222 | 0.0991 | 0.5045 | 0.0225 | 0.1532 | 0.2207 | 0 |
| 5 | septembe | 8  | Dog            | adult | Shy     | Bold | 1 | 2 | 5.2 | 5m2m8  | 5.1.2 | 33 | 11  | 77  | 0  | 6   | 110 | 204 | 0.0539 | 0.3775 | 0      | 0.0294 | 0.5392 | 0 |
| 5 | septembe | 8  | Dog            | adult | Shy     | Bold | 2 | 2 | 5.2 | 5m2m8  | 5.2.2 | 33 | 0   | 179 | 0  | 11  | 14  | 204 | 0      | 0.8775 | 0      | 0.0539 | 0.0686 | 0 |
| 1 | April    | 8  | Feed           | adult | Bold    | Bold | 2 | 4 | 1.4 | 1m4m8  | 1.2.4 | 34 | 64  | 144 | 0  | 34  | 27  | 269 | 0.2379 | 0.5353 | 0      | 0.1264 | 0.1004 | 0 |
| 4 | August   | 12 | aControl       | adult | Bold    | Bold | 1 | 8 | 4.8 | 4m8m12 | 4.1.8 | 34 | 5   | 124 | 0  | 17  | 76  | 222 | 0.0225 | 0.5586 | 0      | 0.0766 | 0.3423 | 0 |
| 4 | August   | 12 | aControl       | adult | Bold    | Bold | 2 | 8 | 4.8 | 4m8m12 | 4.2.8 | 34 | 3   | 128 | 1  | 7   | 83  | 222 | 0.0135 | 0.5766 | 0.0045 | 0.0315 | 0.3739 | 0 |
| 5 | septembe | 9  | Dog            | adult | Bold    | Bold | 1 | 1 | 5.1 | 5m1m9  | 5.1.1 | 34 | 7   | 171 | 1  | 29  | 27  | 235 | 0.0298 | 0.7277 | 0.0043 | 0.1234 | 0.1149 | 0 |
| 5 | septembe | 9  | Dog            | adult | Bold    | Bold | 2 | 1 | 5.1 | 5m1m9  | 5.2.1 | 34 | 1   | 0   | 0  | 0   | 234 | 235 | 0.0043 | 0      | 0      | 0      | 0.9957 | 0 |
| 5 | septembe | 8  | Dog            |       |         |      |   |   |     |        |       |    |     |     |    |     |     |     |        |        |        |        |        |   |
